# Supplementary material for: Detection and long-term quantification of methane emissions from an active landfill
Source: Copernicus journal article supplement (doi:10.5194/amt-2023-124), 2023-08-10
Supplement: Supplementary file 2 [file amt-2023-124-supplement.zip]

# Supporting Information (SI-1): "Detection and long-term quantification of methane emissions from an active landfill"

Pramod Kumar<sup>1</sup>, Christopher Caldwell<sup>1,2</sup>, Grégoire Broquet<sup>1</sup>, Adil Shah<sup>1</sup>, Olivier Laurent<sup>1</sup>, Camille Yver-Kwok<sup>1</sup>, Sebastien Ars<sup>3</sup>, Sara Defratyka<sup>1,6</sup>, Susan Gichuki<sup>1</sup>, Luc Lienhardt<sup>1</sup>, Mathis Lozano<sup>1</sup>, Jean-Daniel Paris<sup>1</sup>, Felix Vogel<sup>3</sup>, Caroline Bouchet<sup>4</sup>, Elisa Allegrini<sup>4</sup>, Robert Kelly<sup>4</sup>, Catherine Juery<sup>5</sup>, and Philippe Ciais<sup>1</sup>

<sup>1</sup>Laboratoire des Sciences du Climat et de l'Environnement (LSCE/IPSL), CEA-CNRS-UVSQ, Université Paris-Saclay, 91191 Gif-sur-Yvette, France

<sup>2</sup>Climate Science Centre, CSIRO Oceans and Atmosphere, Aspendale, VIC, 3195, Australia

<sup>3</sup>Climate Research Division, Environment and Climate Change Canada, Toronto M3H 5T4, Ontario, Canada

<sup>4</sup>SUEZ-Smart & Environmental Solutions, Tour CB21/16 place de l'Iris, 92040, La Défense, France

<sup>5</sup>TotalEnergies Laboratoire Qualité de l'Air (LQA), 69360 Solaize Cedex, France

<sup>6</sup>now at University of Edinburgh, United Kingdom and National Physical Laboratory, United Kingdom

**Correspondence:** Pramod Kumar (pramod.kumar@lsce.ipsl.fr)

**Abstract.** This supporting information material (SI-1) documents all the measurement campaigns conducted for leak detection and quantification of methane emissions from Butte-Bellot landfill.

## List of Figures

|    |                                                                                                                                                                                                                                                                                                                                                                                                                                                                                                                                                                                                |   |
|----|------------------------------------------------------------------------------------------------------------------------------------------------------------------------------------------------------------------------------------------------------------------------------------------------------------------------------------------------------------------------------------------------------------------------------------------------------------------------------------------------------------------------------------------------------------------------------------------------|---|
| 5  | S1.1 The development of the Butte-Bellot landfill as depicted in satellite imagery provided by Google Earth (©Google Earth). The years that each image was captured, progressing from left to right in each row, and from the top row to the bottom row, are: 2003, 2005, 2007, 2009, 2014, 2015, 2016, 2018, and 2020. These images suggest that the Eastern side of the landfill has been filled sequentially in three cells starting in the North-East (active 2005,2007) then progressing to the East (active: 2014, 2015) and finally the South-East (active since 2018 to 2020). . . . . | 4 |
| 10 | S1.2 (a) CH <sub>4</sub> mole fraction time series from the mobile near-surface measurements and (b) wind conditions on <b>September 13, 2016</b> . Enhancement of CH <sub>4</sub> mole fractions above the background in plume transects (c) & (d) along the near-landfill (ABCD) road. The distances along road segments are computed from A towards anticlockwise direction . Black lines in (c)-(d) show the averaged mole fractions computed from these multiple transects. . . . .                                                                                                       | 5 |
| 15 | S1.3 (a) CH <sub>4</sub> mole fraction time series from the mobile near-surface measurements and (b) wind conditions on <b>November 17, 2016</b> . Enhancement of CH <sub>4</sub> mole fractions above the background in plume transects (c) & (d) along the near-landfill (ABCD) road. The distances along road segments are computed from A towards anticlockwise direction . Black lines in (c)-(d) show the averaged mole fractions computed from these multiple transects. . . . .                                                                                                        | 6 |
| 20 | S1.4 (a) CH <sub>4</sub> mole fraction time series from the mobile near-surface measurements and (b) wind rose on <b>December 05, 2016</b> . Enhancement of CH <sub>4</sub> mole fractions above the background in plume transects along the first (c) & (d) and the second (e) & (f) remote roads. The distances along road segments are computed from E . Black lines in (c)-(f) show the averaged mole fractions computed from these multiple transects. . . . .                                                                                                                            | 7 |

|    |                                                                                                                                                                                                                                                                                                                                                                                                                                                                                                                                                                          |    |
|----|--------------------------------------------------------------------------------------------------------------------------------------------------------------------------------------------------------------------------------------------------------------------------------------------------------------------------------------------------------------------------------------------------------------------------------------------------------------------------------------------------------------------------------------------------------------------------|----|
| 25 | S1.5 (a) CH <sub>4</sub> mole fraction time series from the mobile near-surface measurements and (b) wind conditions on <b>August 11, 2017</b> . Enhancement of CH <sub>4</sub> mole fractions above the background in plume transects (c) & (d) along the near-landfill (ABC) road and (e) & (f) far-landfill remote road (EF). The distances along road segments are computed from A and E respectively for near-landfill (ABC) and far-landfill (EF) roads. Black lines in (c)-(f) show the averaged mole fractions computed from these multiple transects. . . . .   | 8  |
| 30 | S1.6 (a) CH <sub>4</sub> mole fraction time series from the mobile near-surface measurements and (b) wind conditions on <b>September 28, 2017</b> . Enhancement of CH <sub>4</sub> mole fractions above the background in plume transects (c) & (d) along the near-landfill (ABC) road. The distances along road segments are computed from A towards anticlockwise direction. Black lines in (c)-(d) show the averaged mole fractions computed from these multiple transects. . . . .                                                                                   | 9  |
| 35 | S1.7 (a) CH <sub>4</sub> mole fraction time series from the mobile near-surface measurements and (b) wind conditions on <b>October 06, 2017</b> . Enhancement of CH <sub>4</sub> mole fractions above the background in plume transects (c) & (d) along the near-landfill (ABC) road and (e) & (f) far-landfill remote road (EF). The distances along road segments are computed from A and E respectively for near-landfill (ABC) and far-landfill (EF) roads. Black lines in (c)-(f) show the averaged mole fractions computed from these multiple transects. . . . .  | 10 |
| 40 | S1.8 (a) CH <sub>4</sub> mole fraction time series from the mobile near-surface measurements and (b) wind conditions on <b>July 26, 2018</b> . Enhancement of CH <sub>4</sub> mole fractions above the background in plume transects (c) & (d) along the near-landfill (ABC) road and (e) & (f) far-landfill remote road (EF). The distances along road segments are computed from A and E respectively for near-landfill (ABC) and far-landfill (EF) roads. Black lines in (c)-(f) show the averaged mole fractions computed from these multiple transects. . . . .     | 11 |
| 45 | S1.9 (a) CH <sub>4</sub> mole fraction time series from the mobile near-surface measurements and (b) wind rose on <b>November 27, 2018</b> . Enhancement of CH <sub>4</sub> mole fractions above the background in plume transects (c) & (d) along the near-landfill (ABC) road. The distances along road segments are computed from A. Black lines in (c)-(d) show the averaged mole fractions computed from these multiple transects. . . . .                                                                                                                          | 12 |
| 50 | S1.10(a) CH <sub>4</sub> mole fraction time series from the mobile near-surface measurements and (b) wind rose on <b>January 10, 2019</b> . Enhancement of CH <sub>4</sub> mole fractions above the background in plume transects (c) & (d) along the near-landfill (ABC) road and (e) & (f) far-landfill remote road (EF). The distances along road segments are computed from A and E respectively for near-landfill (ABC) and far-landfill (EF) roads. Black lines in (c)-(f) show the averaged mole fractions computed from these multiple transects. . . . .        | 13 |
| 55 | S1.11(a) CH <sub>4</sub> mole fraction time series from the mobile near-surface measurements and (b) wind conditions on <b>February 12, 2019</b> . Enhancement of CH <sub>4</sub> mole fractions above the background in plume transects (c) & (d) along the near-landfill (ABC) road and (e) & (f) far-landfill remote road (EF). The distances along road segments are computed from A and E respectively for near-landfill (ABC) and far-landfill (EF) roads. Black lines in (c)-(f) show the averaged mole fractions computed from these multiple transects. . . . . | 14 |
| 60 | S1.12(a) CH <sub>4</sub> mole fraction time series from the mobile near-surface measurements and (b) wind rose on <b>July 10, 2019</b> . Enhancement of CH <sub>4</sub> mole fractions above the background in plume transects (c) & (d) along the near-landfill (ABC) road and (e) & (f) far-landfill remote road (EF). The distances along road segments are computed from A and E respectively for near-landfill (ABC) and far-landfill (EF) roads. Black lines in (c)-(f) show the averaged mole fractions computed from these multiple transects. . . . .           | 15 |
| 65 | S1.13(a) CH <sub>4</sub> mole fraction time series from the mobile near-surface measurements and (b) wind rose on <b>August 02, 2019</b> . Enhancement of CH <sub>4</sub> mole fractions above the background in plume transects (c) & (d) along the near-landfill (ABC) road and (e) & (f) far-landfill remote road (EF). The distances along road segments are computed from A and E respectively for near-landfill (ABC) and far-landfill (EF) roads. Black lines in (c)-(f) show the averaged mole fractions computed from these multiple transects. . . . .         | 16 |
| 70 | S1.14(a) CH <sub>4</sub> mole fraction time series from the mobile near-surface measurements and (b) wind rose on <b>August 29, 2019</b> . Enhancement of CH <sub>4</sub> mole fractions above the background in plume transects (c) & (d) along the near-landfill (ABC) road. The distances along road segments are computed from A. Black lines in (c)-(d) show the averaged mole fractions computed from these multiple transects. . . . .                                                                                                                            | 17 |

|     |                                                                                                                                                                                                                                                                                                                                                                                                                                                                                                                                                                     |    |
|-----|---------------------------------------------------------------------------------------------------------------------------------------------------------------------------------------------------------------------------------------------------------------------------------------------------------------------------------------------------------------------------------------------------------------------------------------------------------------------------------------------------------------------------------------------------------------------|----|
| 75  | S1.15(a) CH <sub>4</sub> mole fraction time series from the mobile near-surface measurements and (b) wind rose on <b>September 13, 2019</b> . Enhancement of CH <sub>4</sub> mole fractions above the background in plume transects (c) & (d) along the near-landfill (ABC) road and (e) & (f) far-landfill remote road (EF). The distances along road segments are computed from A and E respectively for near-landfill (ABC) and far-landfill (EF) roads. Black lines in (c)-(f) show the averaged mole fractions computed from these multiple transects. . . . . | 18 |
| 80  | S1.16(a) CH <sub>4</sub> mole fraction time series from the mobile near-surface measurements and (b) wind rose on <b>December 09, 2019</b> . Enhancement of CH <sub>4</sub> mole fractions above the background in plume transects (c) & (d) along the near-landfill (ABC) road and (e) & (f) far-landfill remote road (EF). The distances along road segments are computed from A and E respectively for near-landfill (ABC) and far-landfill (EF) roads. Black lines in (c)-(f) show the averaged mole fractions computed from these multiple transects. . . . .  | 19 |
| 85  | S1.17(a) CH <sub>4</sub> mole fraction time series from the mobile near-surface measurements and (b) wind rose on <b>February 05, 2020</b> . Enhancement of CH <sub>4</sub> mole fractions above the background in plume transects (c) & (d) along the near-landfill (ABC) road and (e) & (f) far-landfill remote road (EF). The distances along road segments are computed from A and E respectively for near-landfill (ABC) and far-landfill (EF) roads. Black lines in (c)-(f) show the averaged mole fractions computed from these multiple transects. . . . .  | 20 |
| 90  | S1.18(a) CH <sub>4</sub> mole fraction time series from the mobile near-surface measurements and (b) wind rose on <b>March 04, 2020</b> . Enhancement of CH <sub>4</sub> mole fractions above the background in plume transects (c) & (d) along the near-landfill (ABC) road. The distances along road segments are computed from A for near-landfill (ABC) road. Black lines in (c)-(d) show the averaged mole fractions computed from these multiple transects. . . . .                                                                                           | 21 |
| 95  | S1.19(a) CH <sub>4</sub> mole fraction time series from the mobile near-surface measurements and (b) wind rose on <b>September 04, 2020</b> . Enhancement of CH <sub>4</sub> mole fractions above the background in plume transects (c) & (d) along the near-landfill (ABC) road. The distances along road segments are computed from A for near-landfill (ABC) road. Black lines in (c)-(d) show the averaged mole fractions computed from these multiple transects. . . . .                                                                                       | 22 |
| 100 | S1.20(a) CH <sub>4</sub> mole fraction time series from the mobile near-surface measurements and (b) wind conditions on <b>October 15, 2020</b> . Enhancement of CH <sub>4</sub> mole fractions above the background in plume transects (c) & (d) along the near-landfill (ABC) road. The distances along road segments are computed from A for near-landfill (ABC) road. Black lines in (c)-(d) show the averaged mole fractions computed from these multiple transects. . . . .                                                                                   | 23 |
| 105 | S1.21(a) CH <sub>4</sub> mole fraction time series from the mobile near-surface measurements and (b) wind rose on <b>December 01, 2020</b> . Enhancement of CH <sub>4</sub> mole fractions above the background in plume transects (c) & (d) along the near-landfill (ABC) road and (e) & (f) far-landfill remote road (EF). The distances along road segments are computed from A and E respectively for near-landfill (ABC) and far-landfill (EF) roads. Black lines in (c)-(f) show the averaged mole fractions computed from these multiple transects. . . . .  | 24 |
|     | S1.22(a) CH <sub>4</sub> mole fraction time series from the mobile near-surface measurements and (b) wind rose on <b>December 08, 2020</b> . Enhancement of CH <sub>4</sub> mole fractions above the background in plume transects (c) & (d) along the near-landfill (ABC) road and (e) & (f) far-landfill remote road (EF). The distances along road segments are computed from A and E respectively for near-landfill (ABC) and far-landfill (EF) roads. Black lines in (c)-(f) show the averaged mole fractions computed from these multiple transects. . . . .  | 25 |

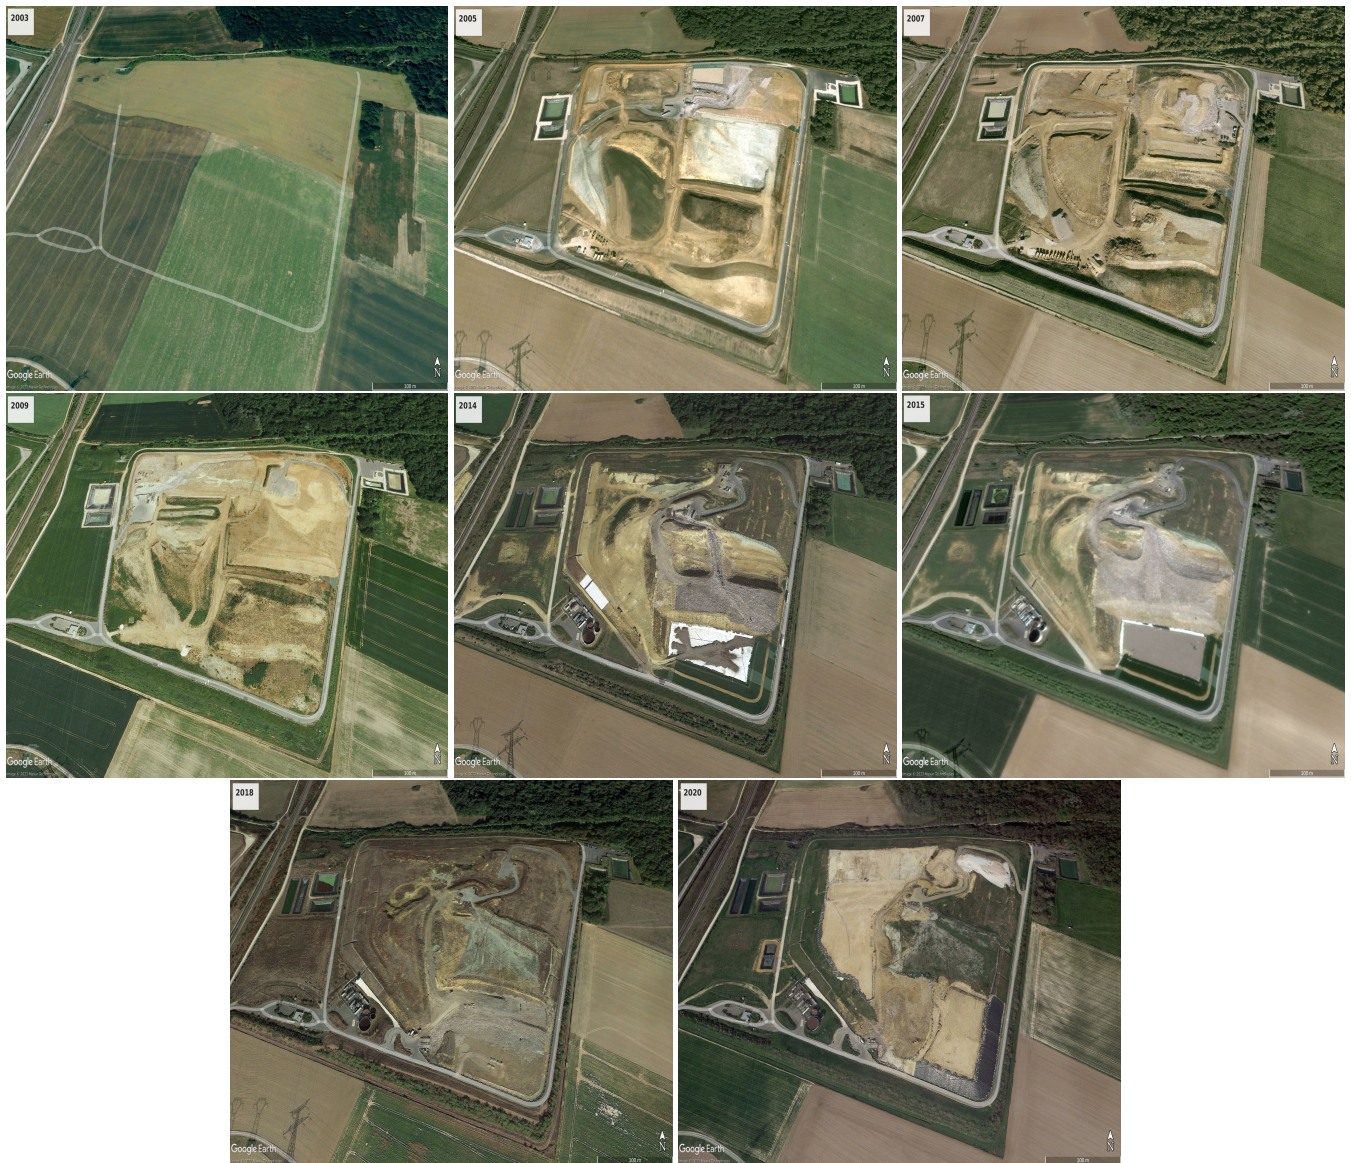

**Figure S1.1.** The development of the Butte-Bellot landfill as depicted in satellite imagery provided by Google Earth (©Google Earth). The years that each image was captured, progressing from left to right in each row, and from the top row to the bottom row, are: 2003, 2005, 2007, 2009, 2014, 2015, 2016, 2018, and 2020. These images suggest that the Eastern side of the landfill has been filled sequentially in three cells starting in the North-East (active 2005,2007) then progressing to the East (active: 2014, 2015) and finally the South-East (active since 2018 to 2020).

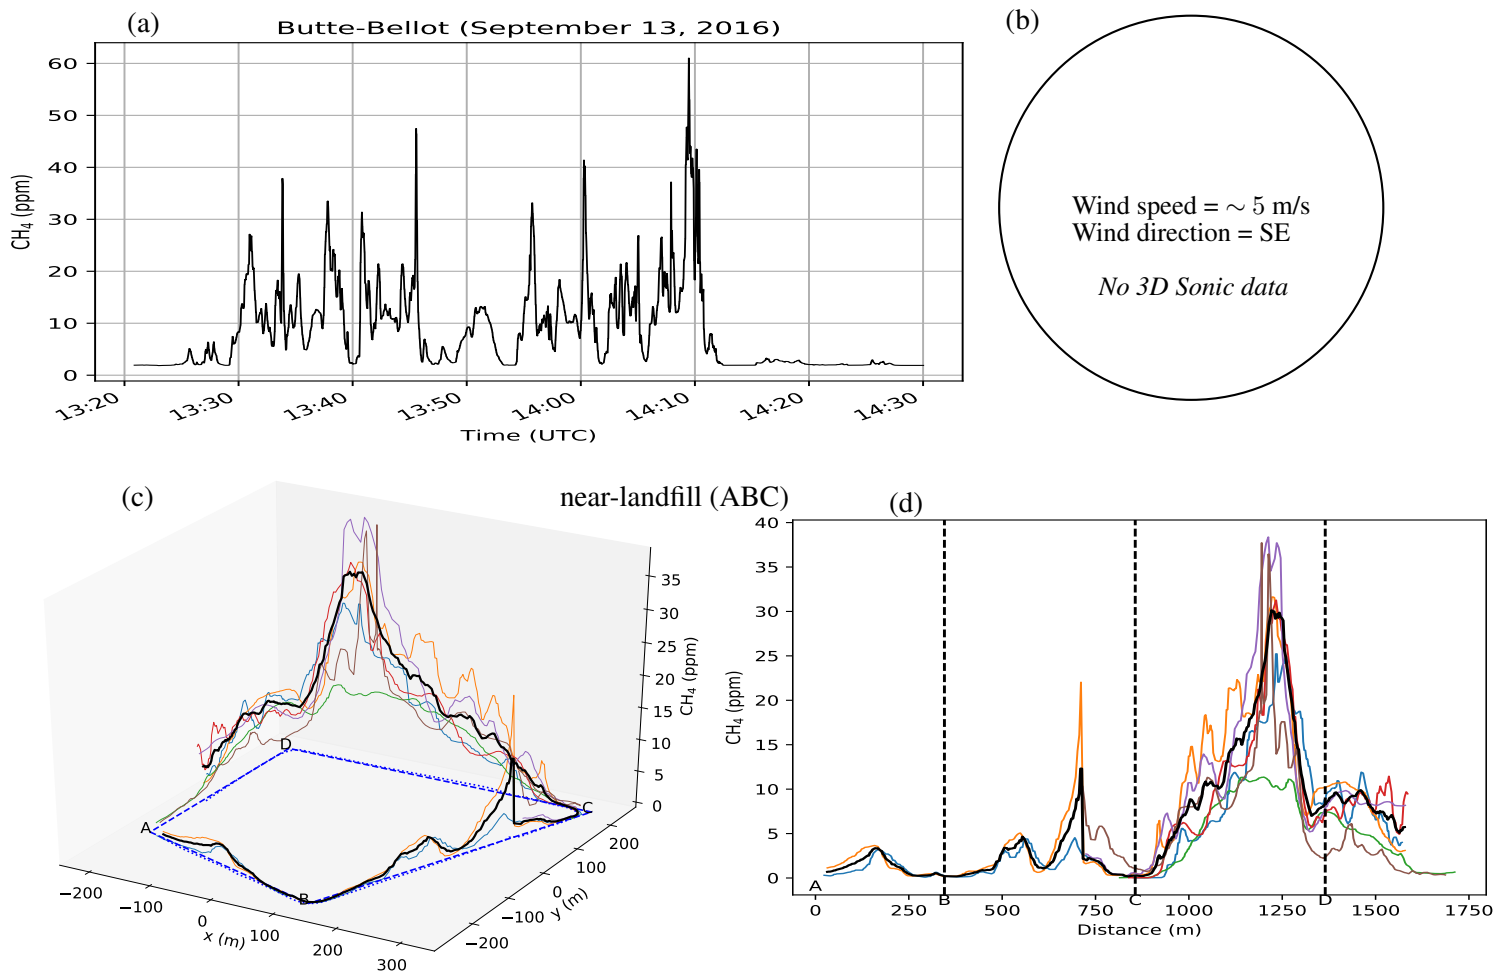

**Figure S1.2.** (a) CH<sub>4</sub> mole fraction time series from the mobile near-surface measurements and (b) wind conditions on **September 13, 2016**. Enhancement of CH<sub>4</sub> mole fractions above the background in plume transects (c) & (d) along the near-landfill (ABCD) road. The distances along road segments are computed from A towards anticlockwise direction. Black lines in (c)-(d) show the averaged mole fractions computed from these multiple transects.



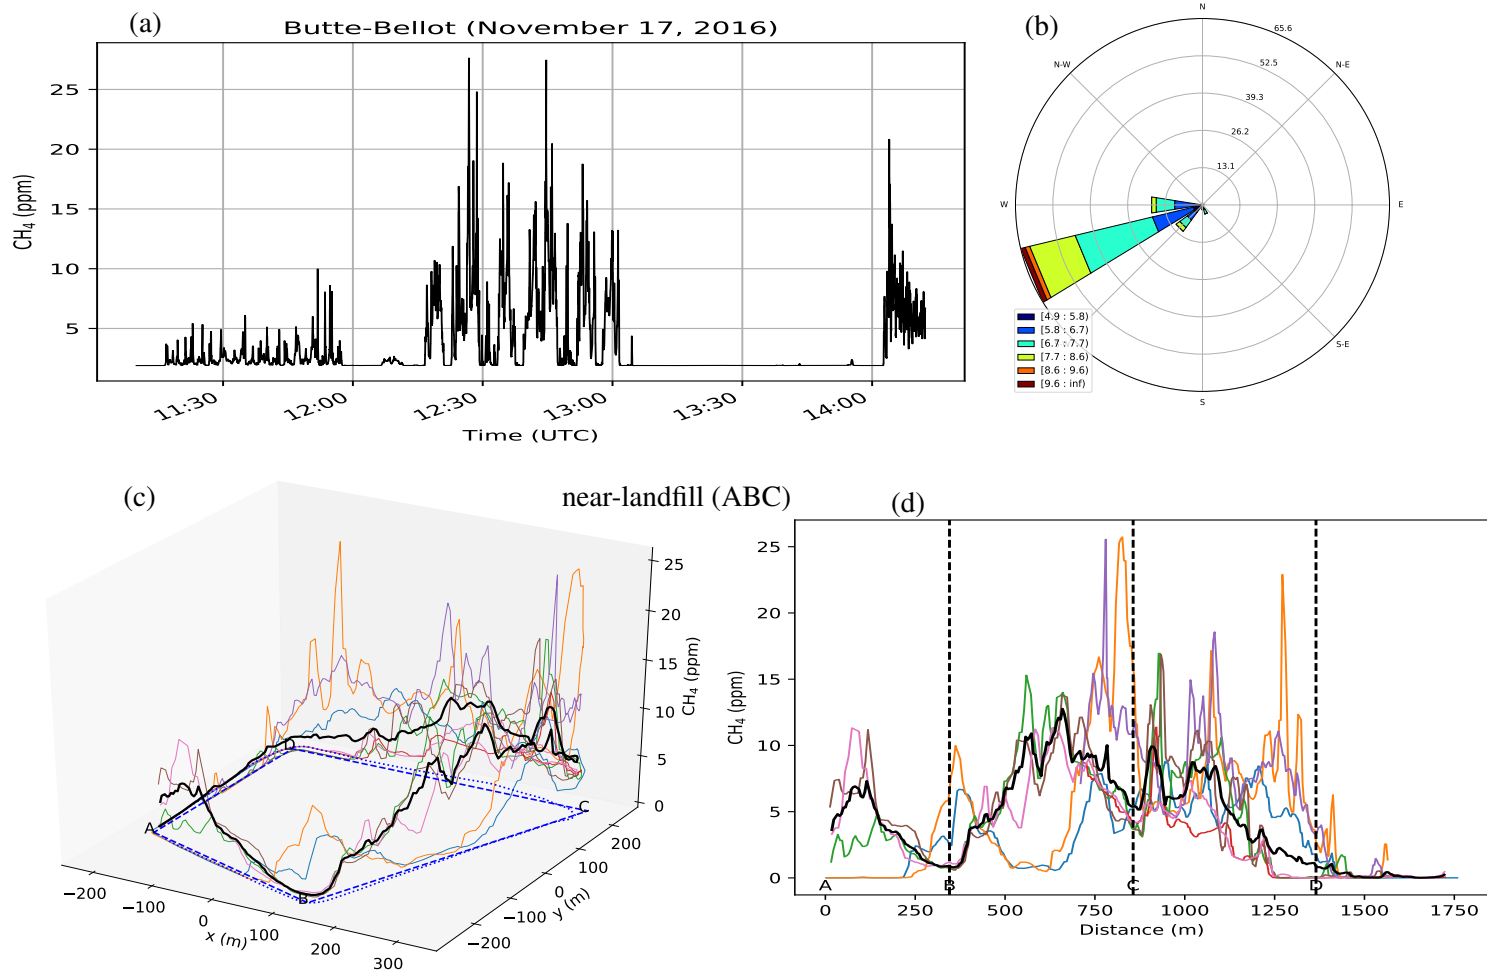

**Figure S1.3.** (a)  $\text{CH}_4$  mole fraction time series from the mobile near-surface measurements and (b) wind conditions on **November 17, 2016**. Enhancement of  $\text{CH}_4$  mole fractions above the background in plume transects (c) & (d) along the near-landfill (ABCD) road. The distances along road segments are computed from A towards anticlockwise direction. Black lines in (c)-(d) show the averaged mole fractions computed from these multiple transects.

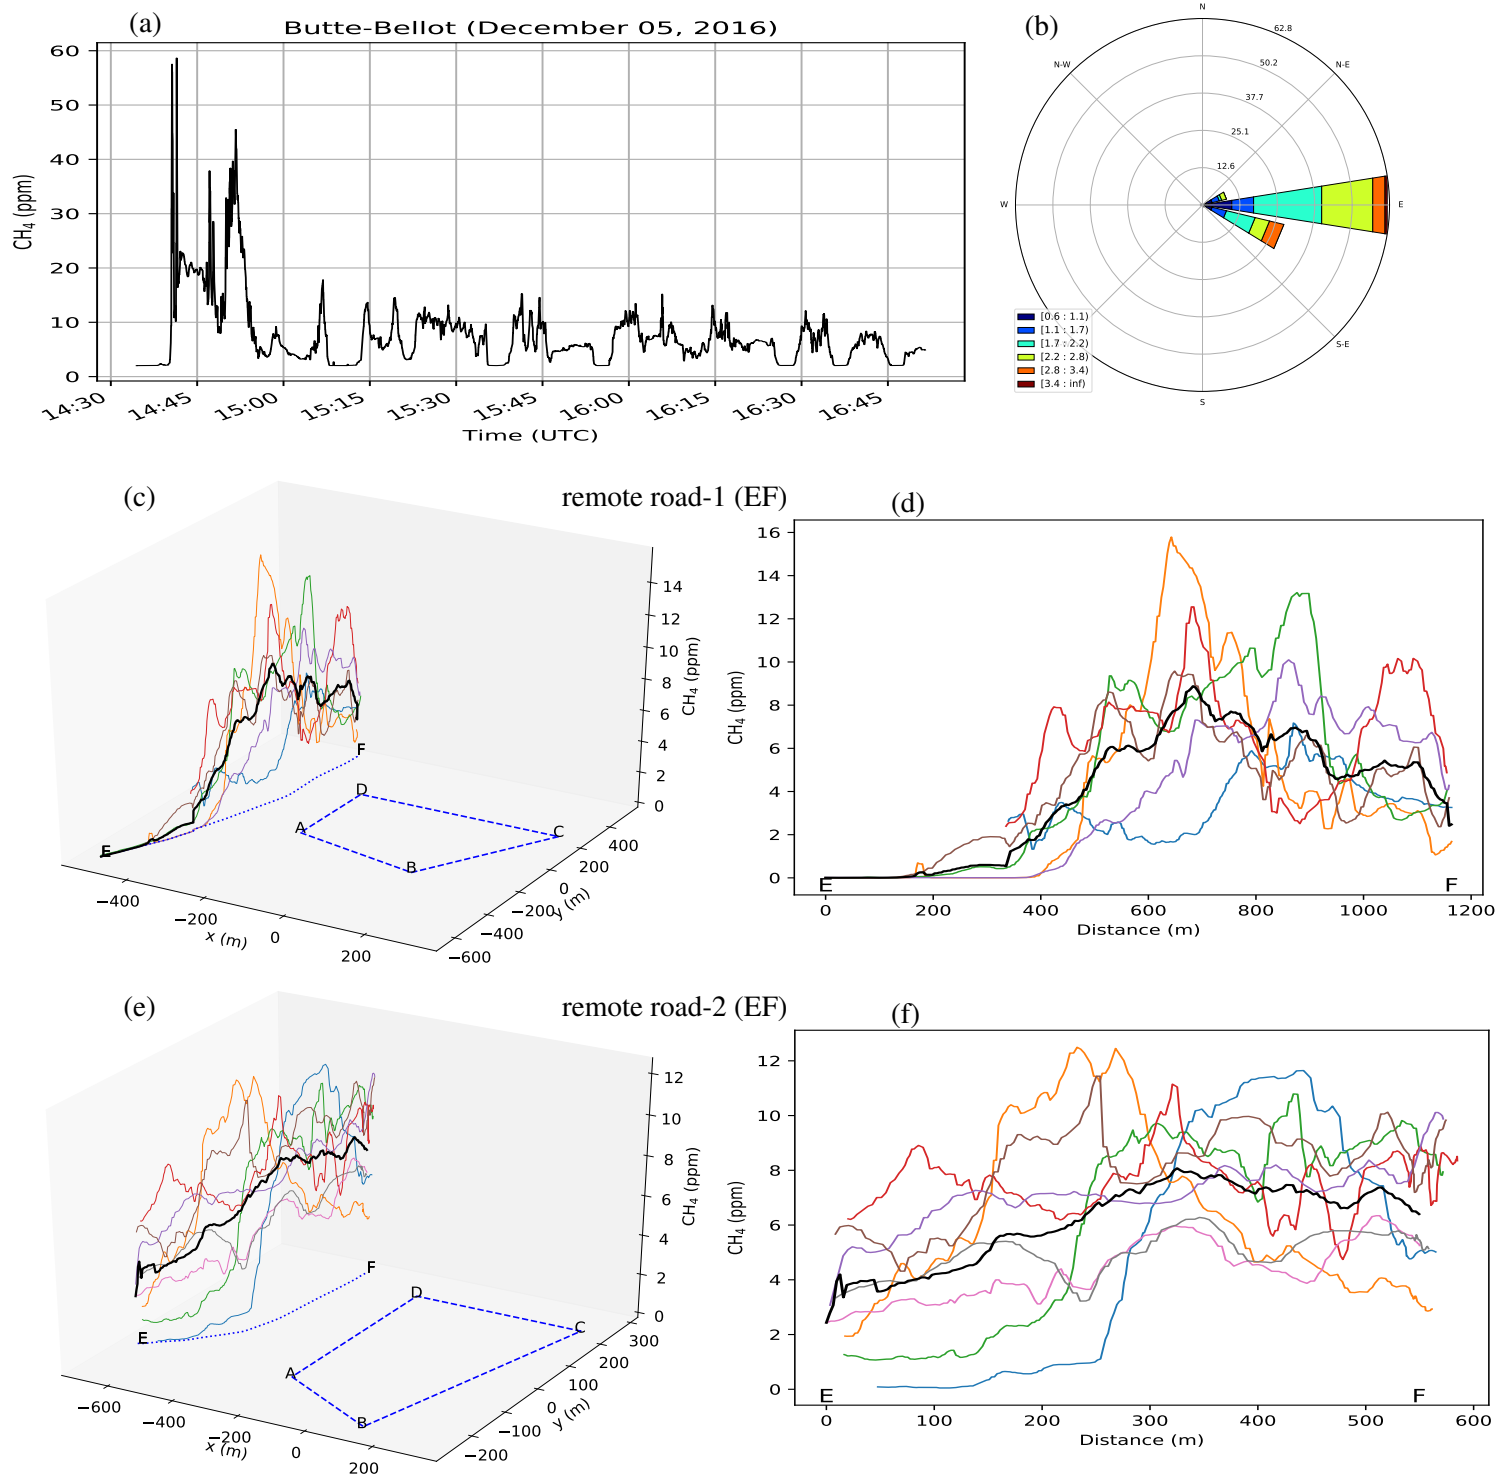

**Figure S1.4.** (a) CH<sub>4</sub> mole fraction time series from the mobile near-surface measurements and (b) wind rose on **December 05, 2016**. Enhancement of CH<sub>4</sub> mole fractions above the background in plume transects along the first (c) & (d) and the second (e) & (f) remote roads. The distances along road segments are computed from E. Black lines in (c)-(f) show the averaged mole fractions computed from these multiple transects.

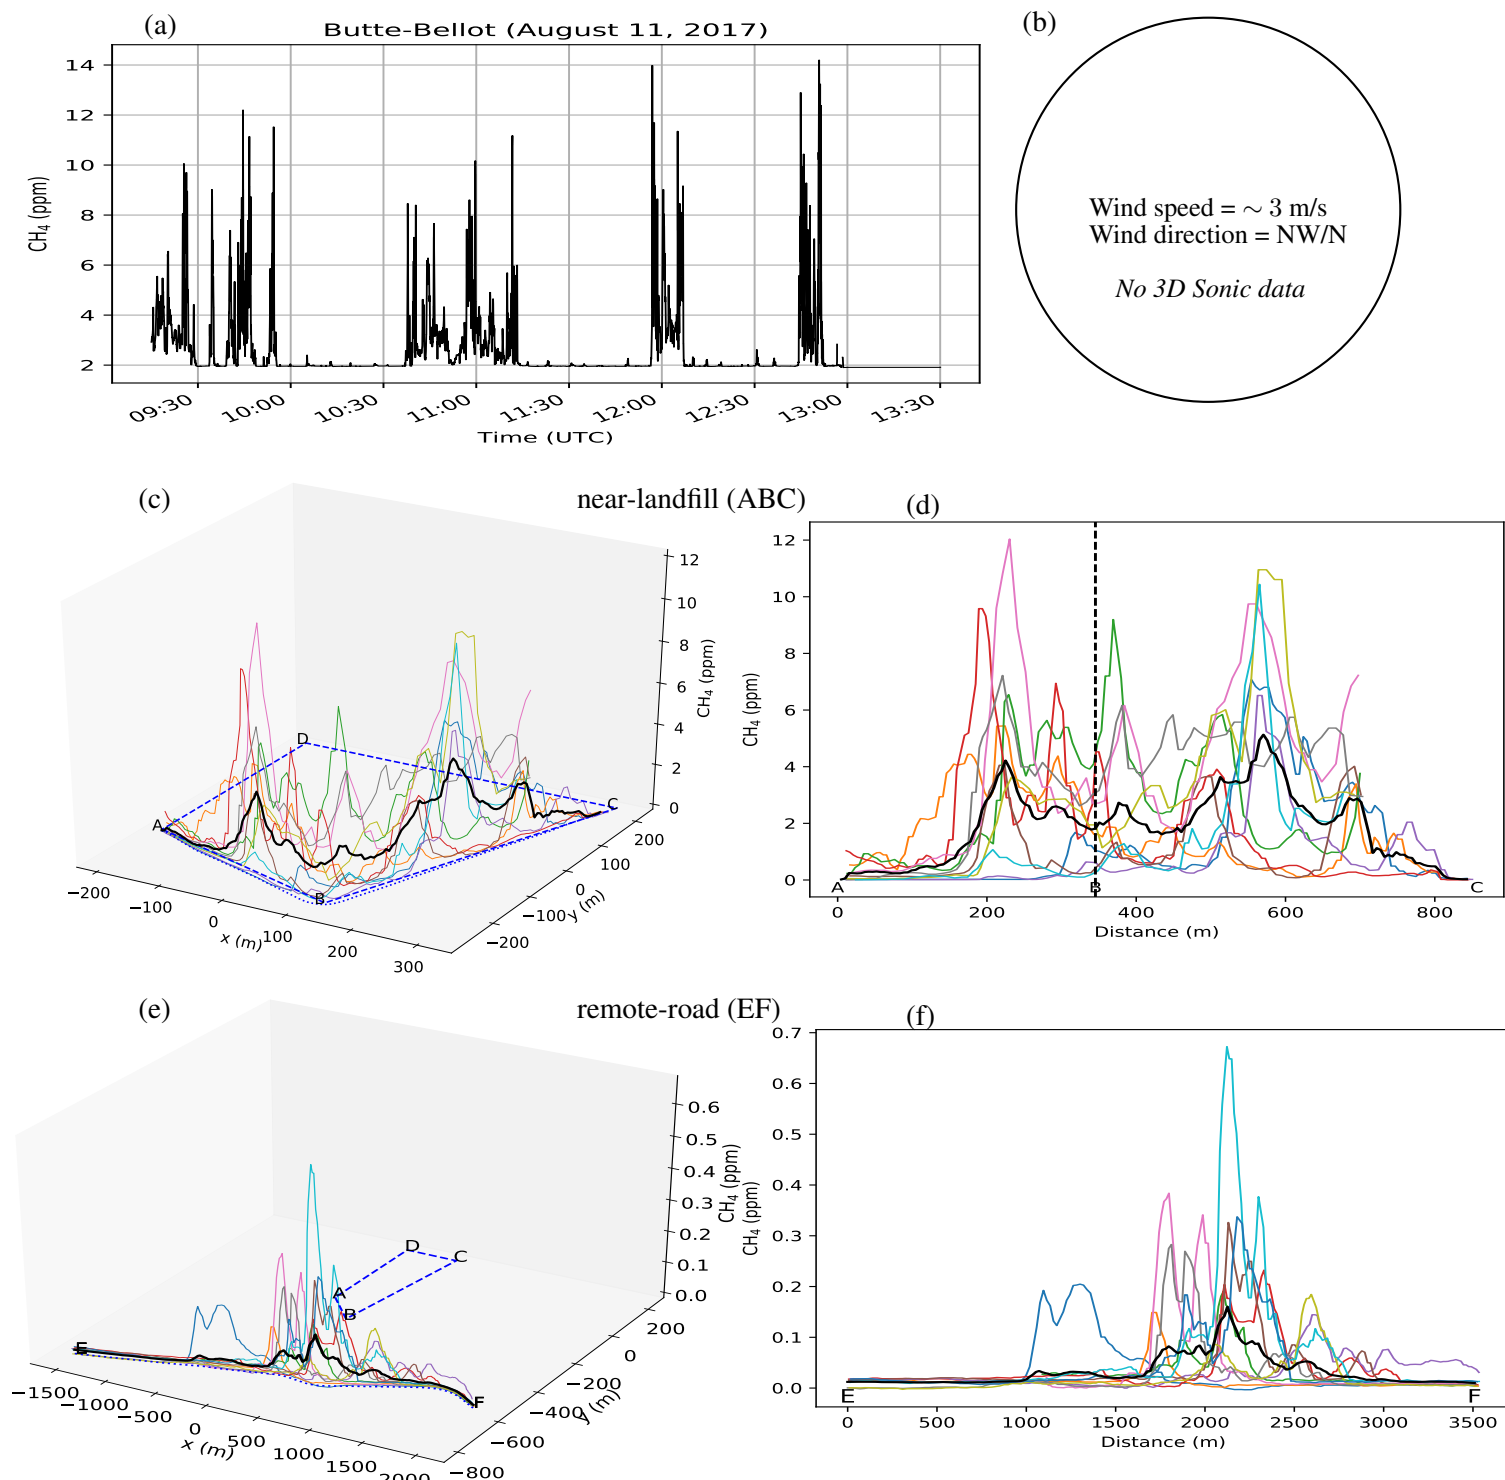

**Figure S1.5.** (a) CH<sub>4</sub> mole fraction time series from the mobile near-surface measurements and (b) wind conditions on **August 11, 2017**. Enhancement of CH<sub>4</sub> mole fractions above the background in plume transects (c) & (d) along the near-landfill (ABC) road and (e) & (f) far-landfill remote road (EF). The distances along road segments are computed from A and E respectively for near-landfill (ABC) and far-landfill (EF) roads. Black lines in (c)-(f) show the averaged mole fractions computed from these multiple transects.



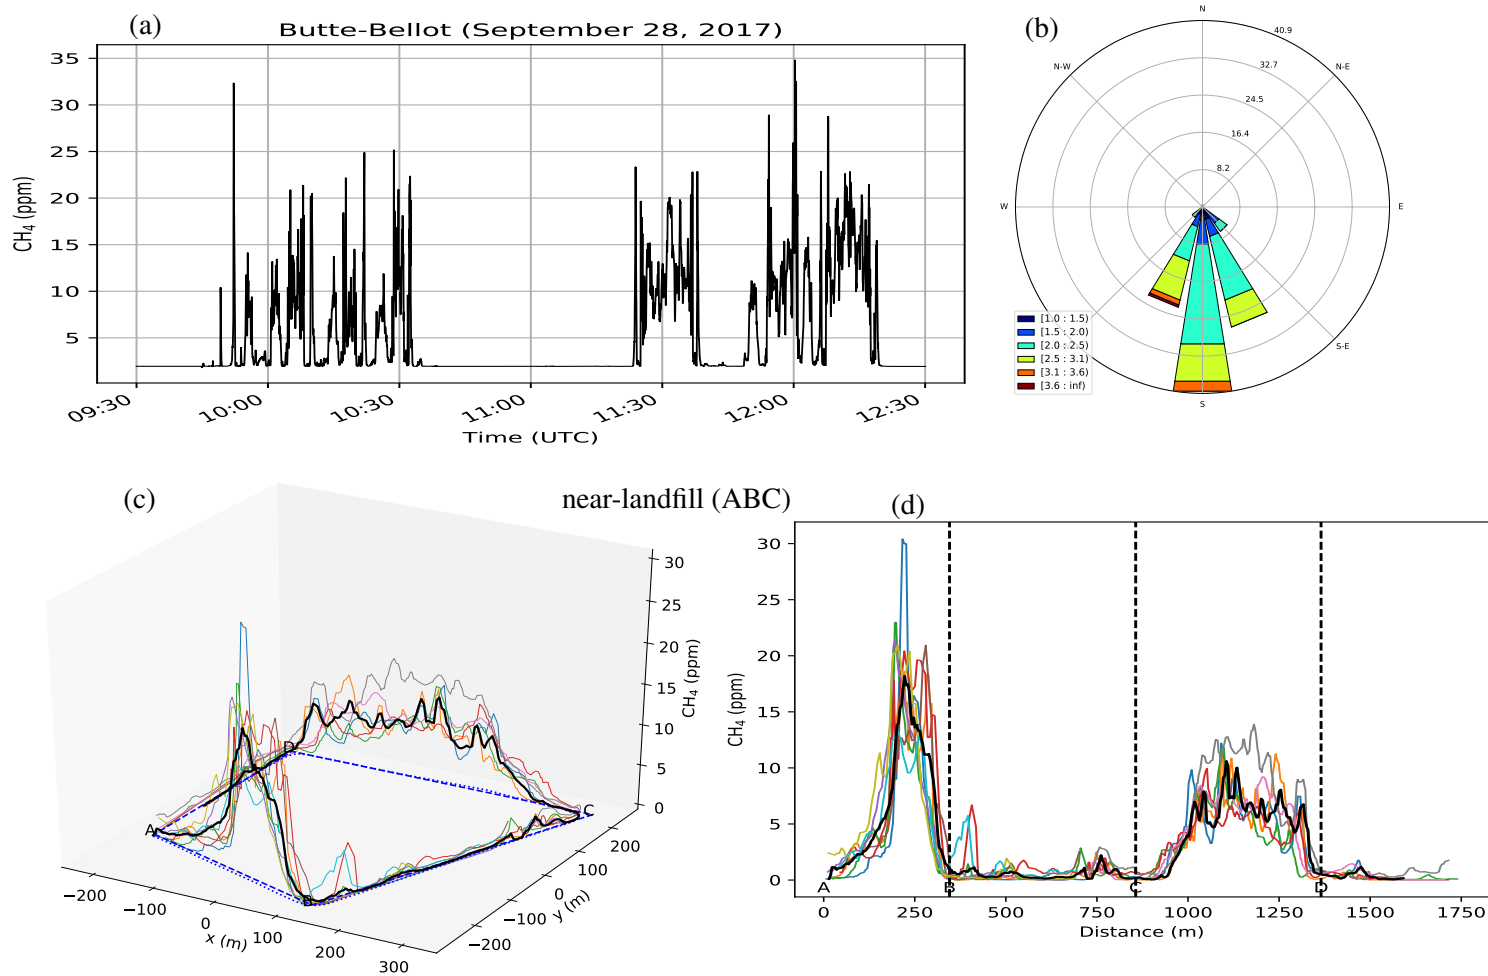

**Figure S1.6.** (a) CH<sub>4</sub> mole fraction time series from the mobile near-surface measurements and (b) wind conditions on **September 28, 2017**. Enhancement of CH<sub>4</sub> mole fractions above the background in plume transects (c) & (d) along the near-landfill (ABC) road. The distances along road segments are computed from A towards anticlockwise direction. Black lines in (c)-(d) show the averaged mole fractions computed from these multiple transects.

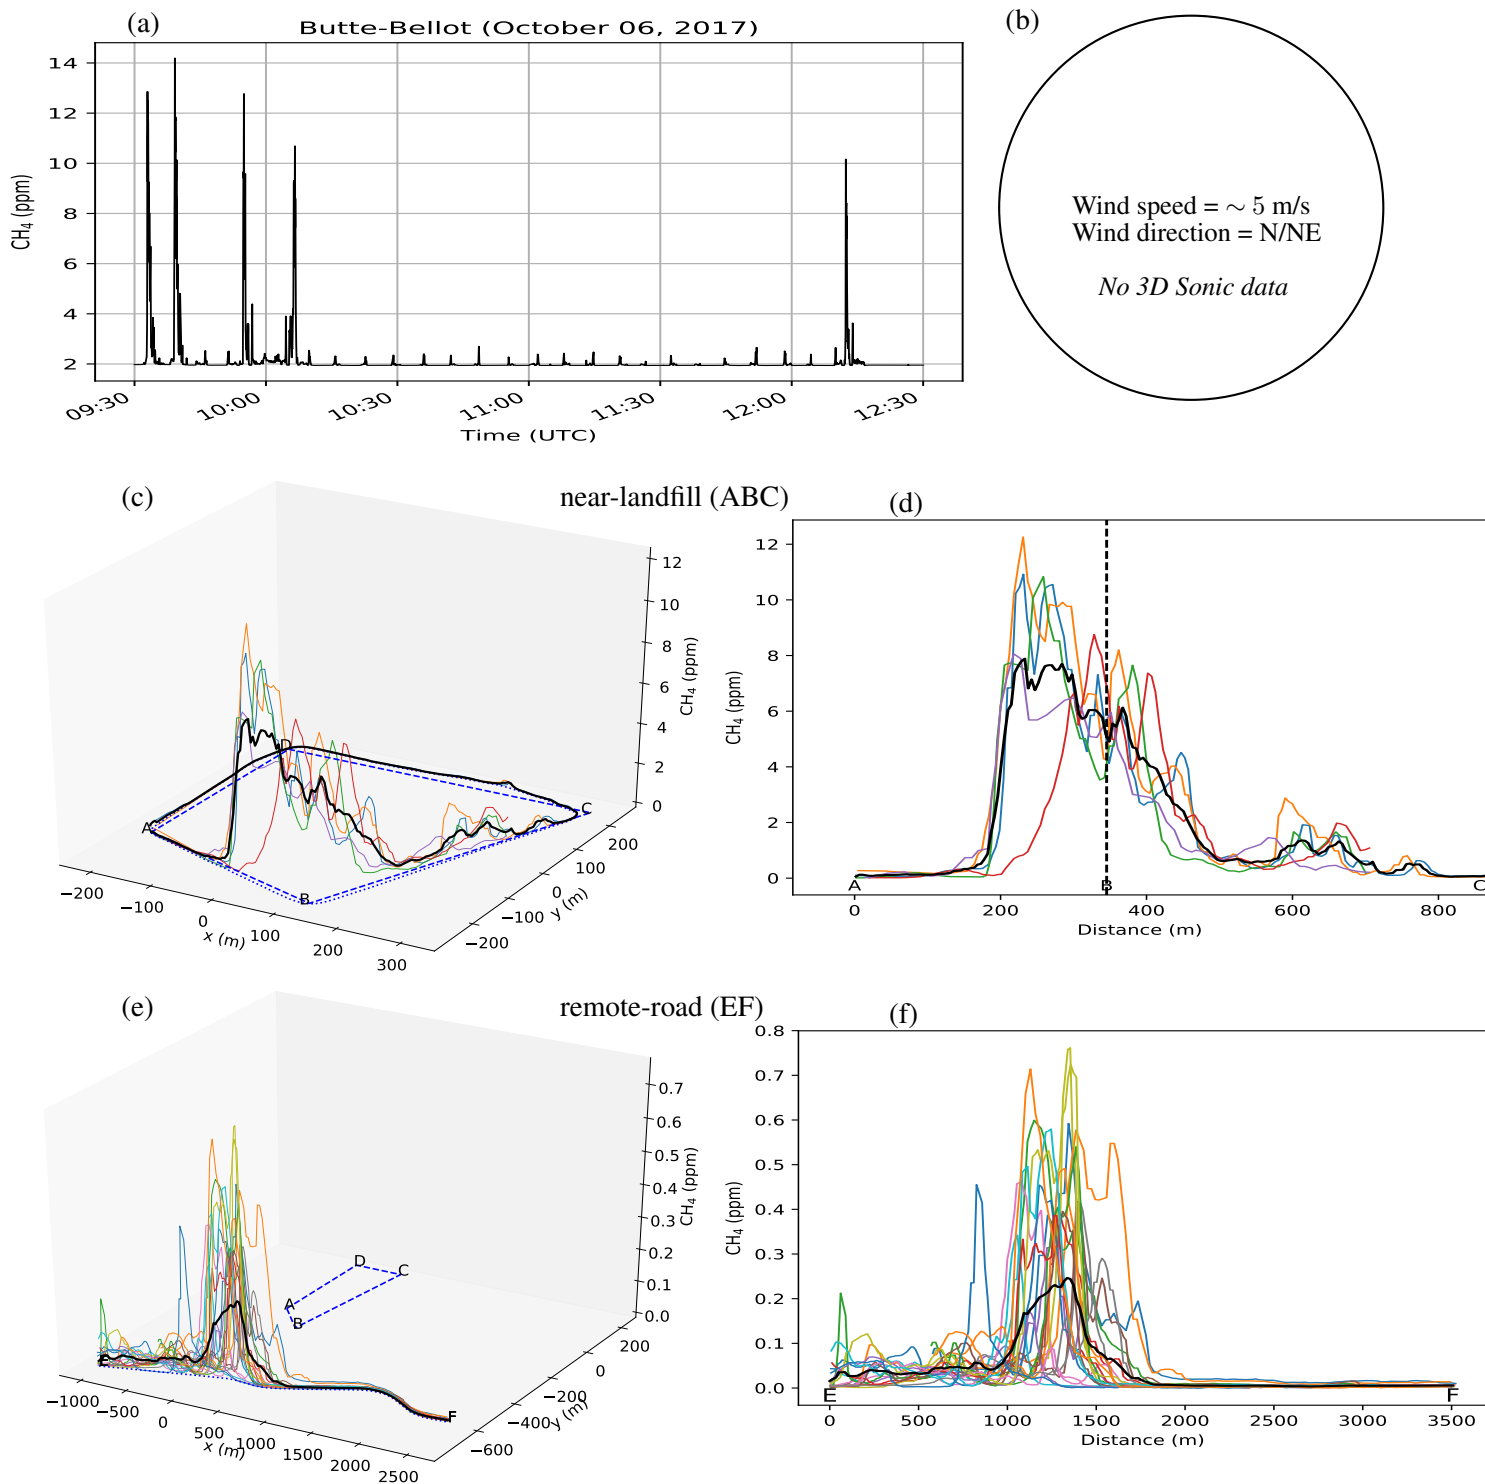

**Figure S1.7.** (a) CH<sub>4</sub> mole fraction time series from the mobile near-surface measurements and (b) wind conditions on **October 06, 2017**. Enhancement of CH<sub>4</sub> mole fractions above the background in plume transects (c) & (d) along the near-landfill (ABC) road and (e) & (f) far-landfill remote road (EF). The distances along road segments are computed from A and E respectively for near-landfill (ABC) and far-landfill (EF) roads. Black lines in (c)-(f) show the averaged mole fractions computed from these multiple transects.

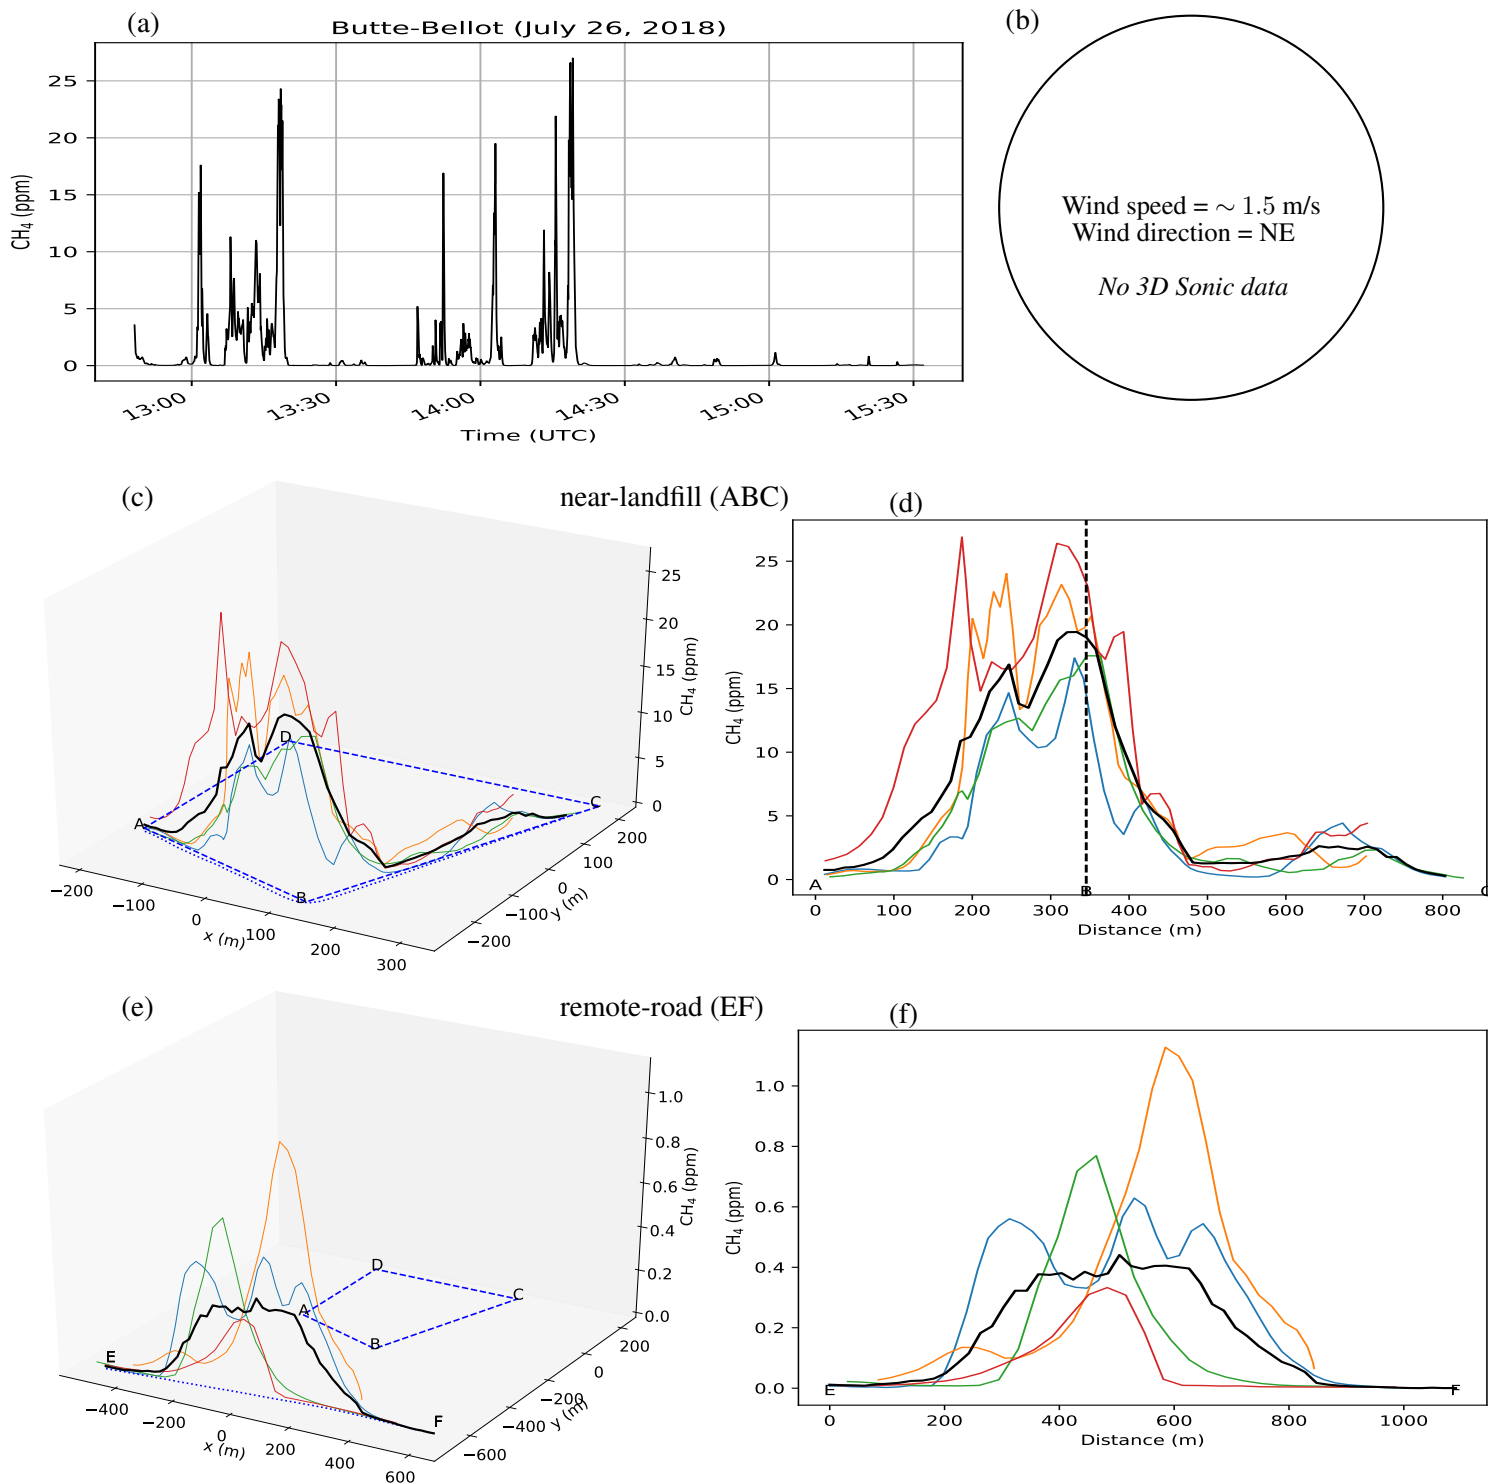

**Figure S1.8.** (a) CH<sub>4</sub> mole fraction time series from the mobile near-surface measurements and (b) wind conditions on **July 26, 2018**. Enhancement of CH<sub>4</sub> mole fractions above the background in plume transects (c) & (d) along the near-landfill (ABC) road and (e) & (f) far-landfill remote road (EF). The distances along road segments are computed from A and E respectively for near-landfill (ABC) and far-landfill (EF) roads. Black lines in (c)-(f) show the averaged mole fractions computed from these multiple transects.

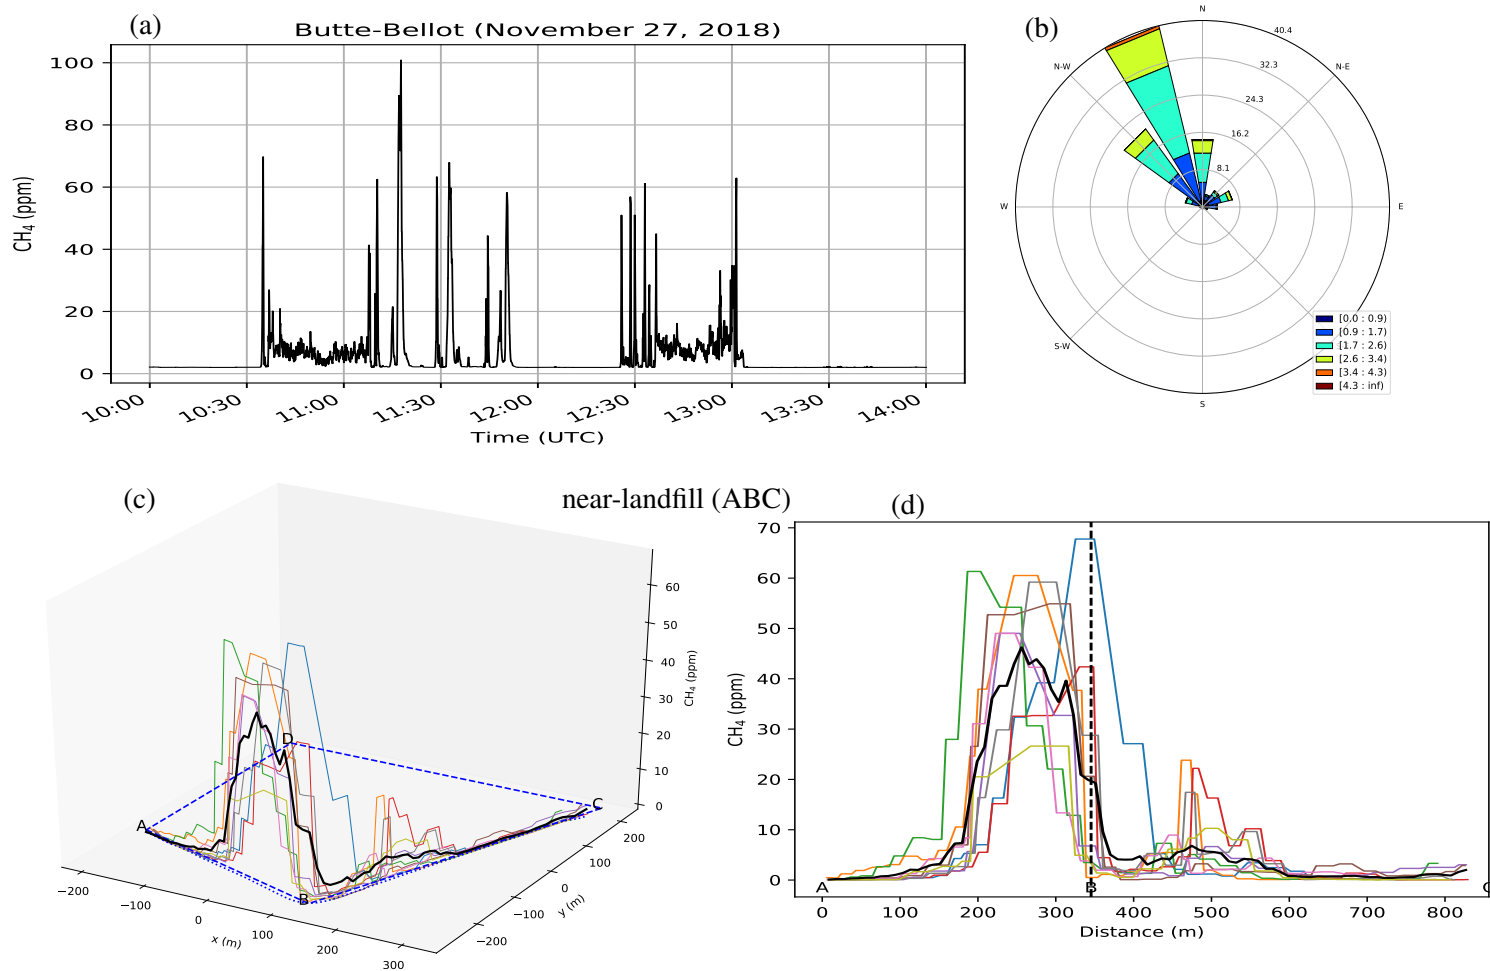

**Figure S1.9.** (a)  $\text{CH}_4$  mole fraction time series from the mobile near-surface measurements and (b) wind rose on **November 27, 2018**. Enhancement of  $\text{CH}_4$  mole fractions above the background in plume transects (c) & (d) along the near-landfill (ABC) road. The distances along road segments are computed from A. Black lines in (c)-(d) show the averaged mole fractions computed from these multiple transects.

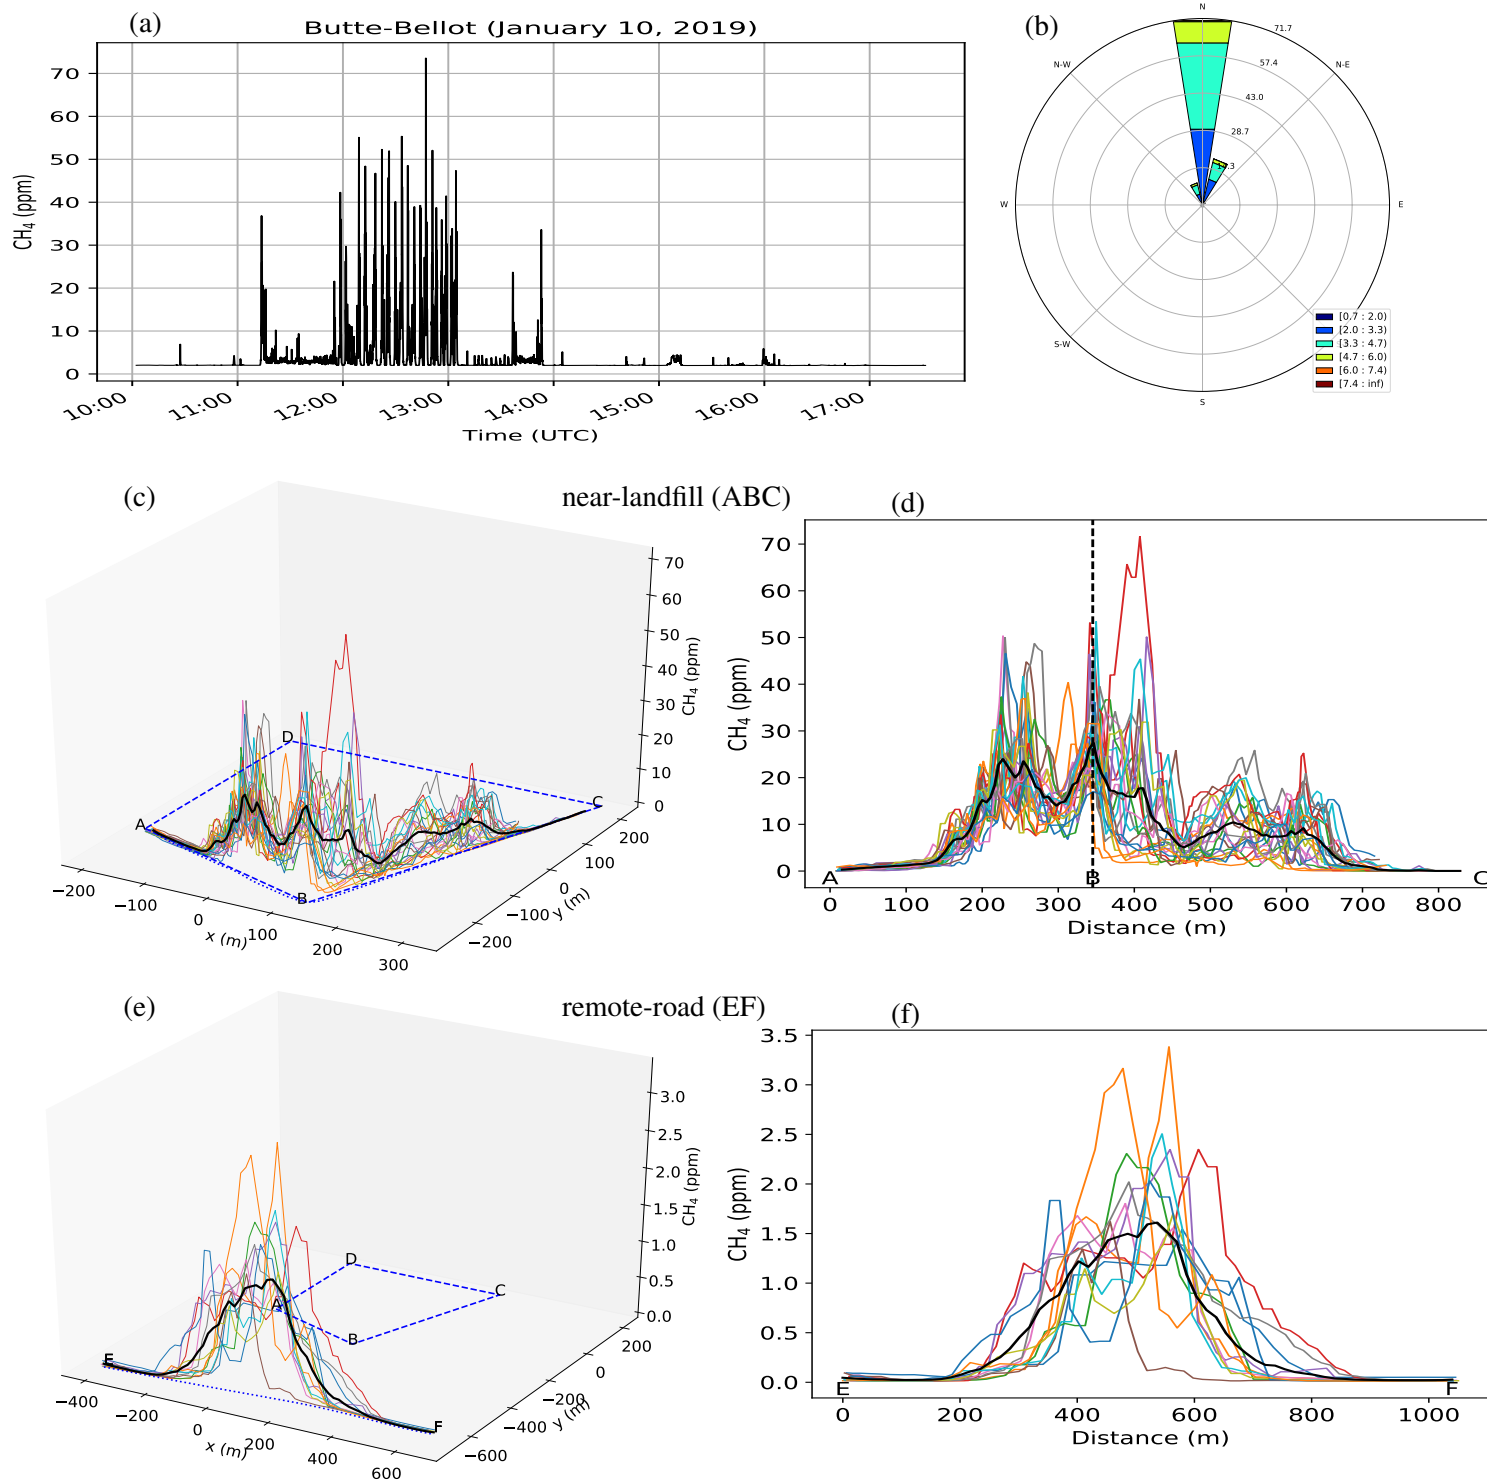

**Figure S1.10.** (a)  $\text{CH}_4$  mole fraction time series from the mobile near-surface measurements and (b) wind rose on **January 10, 2019**. Enhancement of  $\text{CH}_4$  mole fractions above the background in plume transects (c) & (d) along the near-landfill (ABC) road and (e) & (f) far-landfill remote road (EF). The distances along road segments are computed from A and E respectively for near-landfill (ABC) and far-landfill (EF) roads. Black lines in (c)-(f) show the averaged mole fractions computed from these multiple transects.

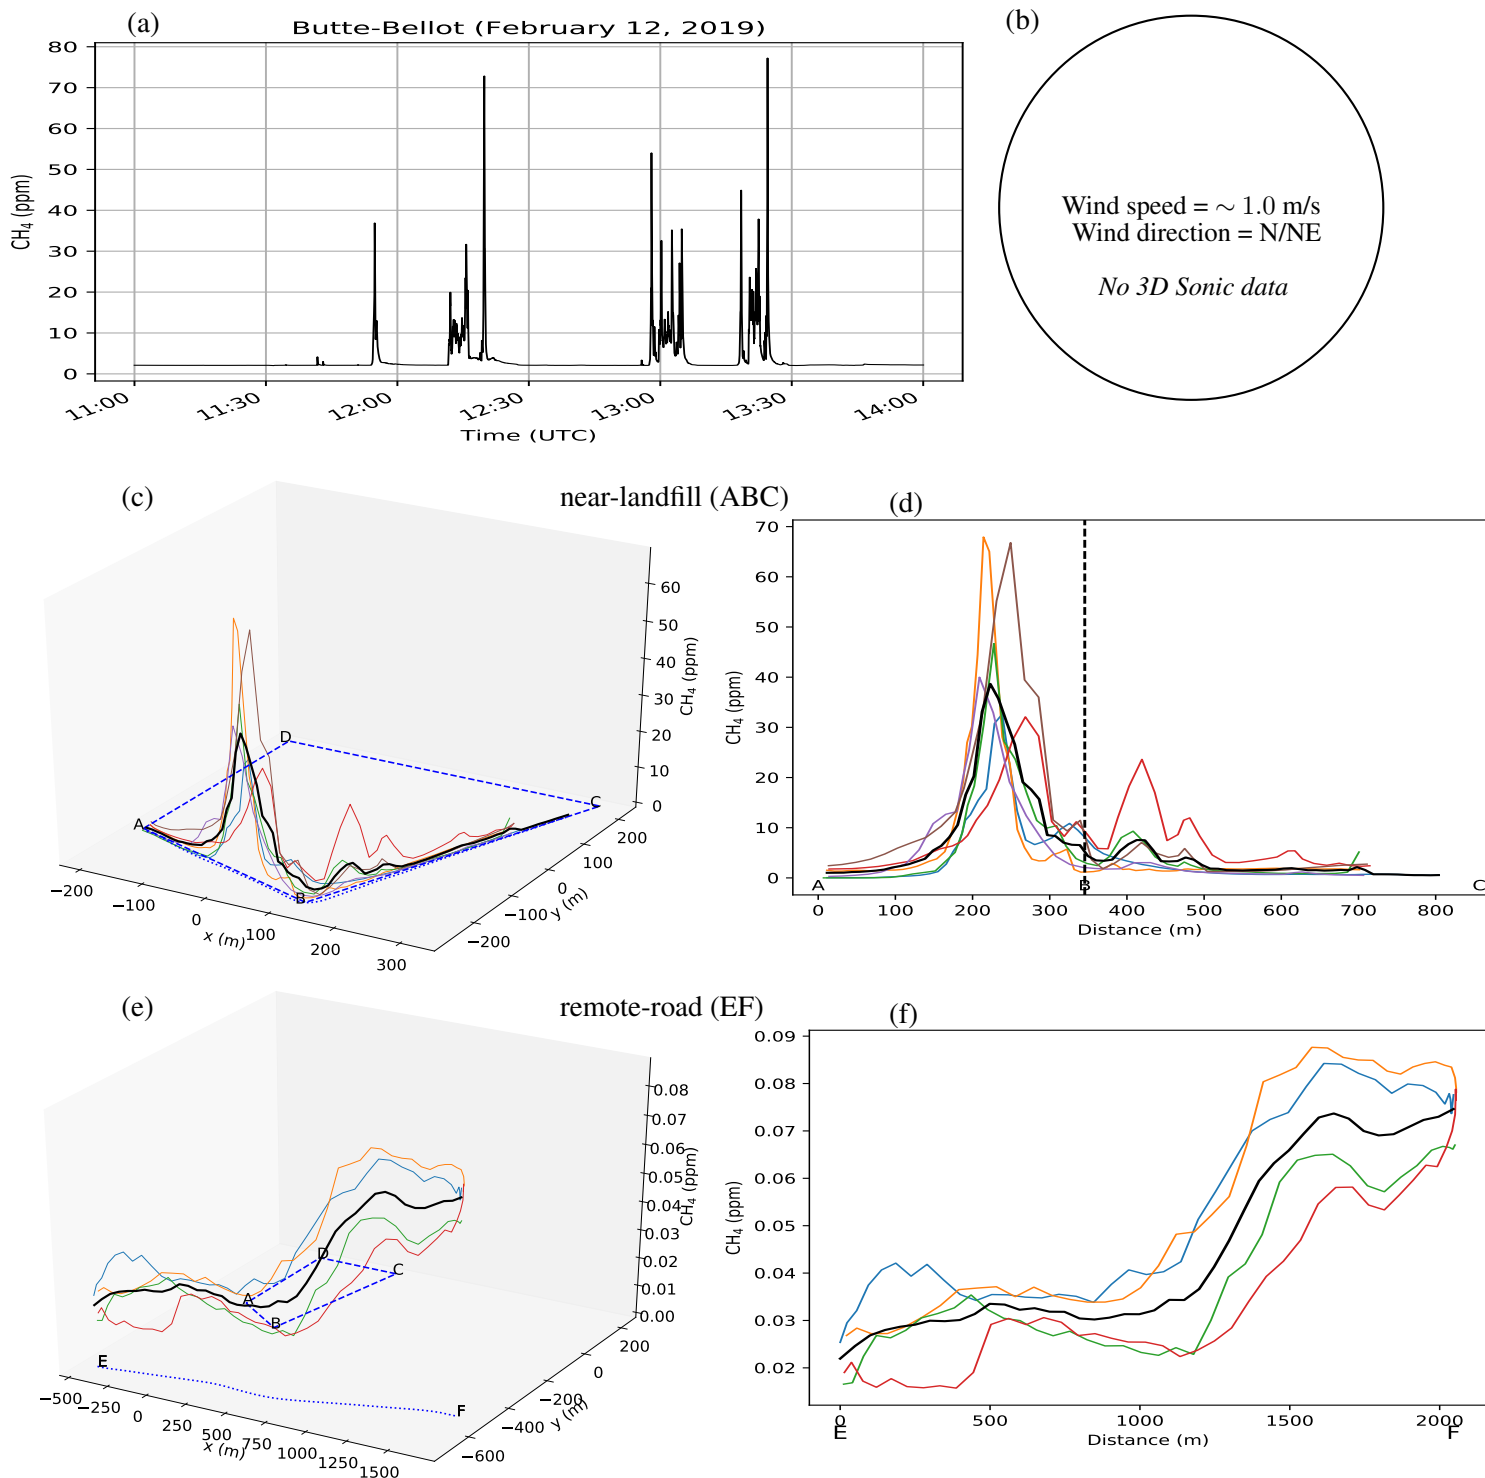

**Figure S1.11.** (a) CH<sub>4</sub> mole fraction time series from the mobile near-surface measurements and (b) wind conditions on **February 12, 2019**. Enhancement of CH<sub>4</sub> mole fractions above the background in plume transects (c) & (d) along the near-landfill (ABC) road and (e) & (f) far-landfill remote road (EF). The distances along road segments are computed from A and E respectively for near-landfill (ABC) and far-landfill (EF) roads. Black lines in (c)-(f) show the averaged mole fractions computed from these multiple transects.



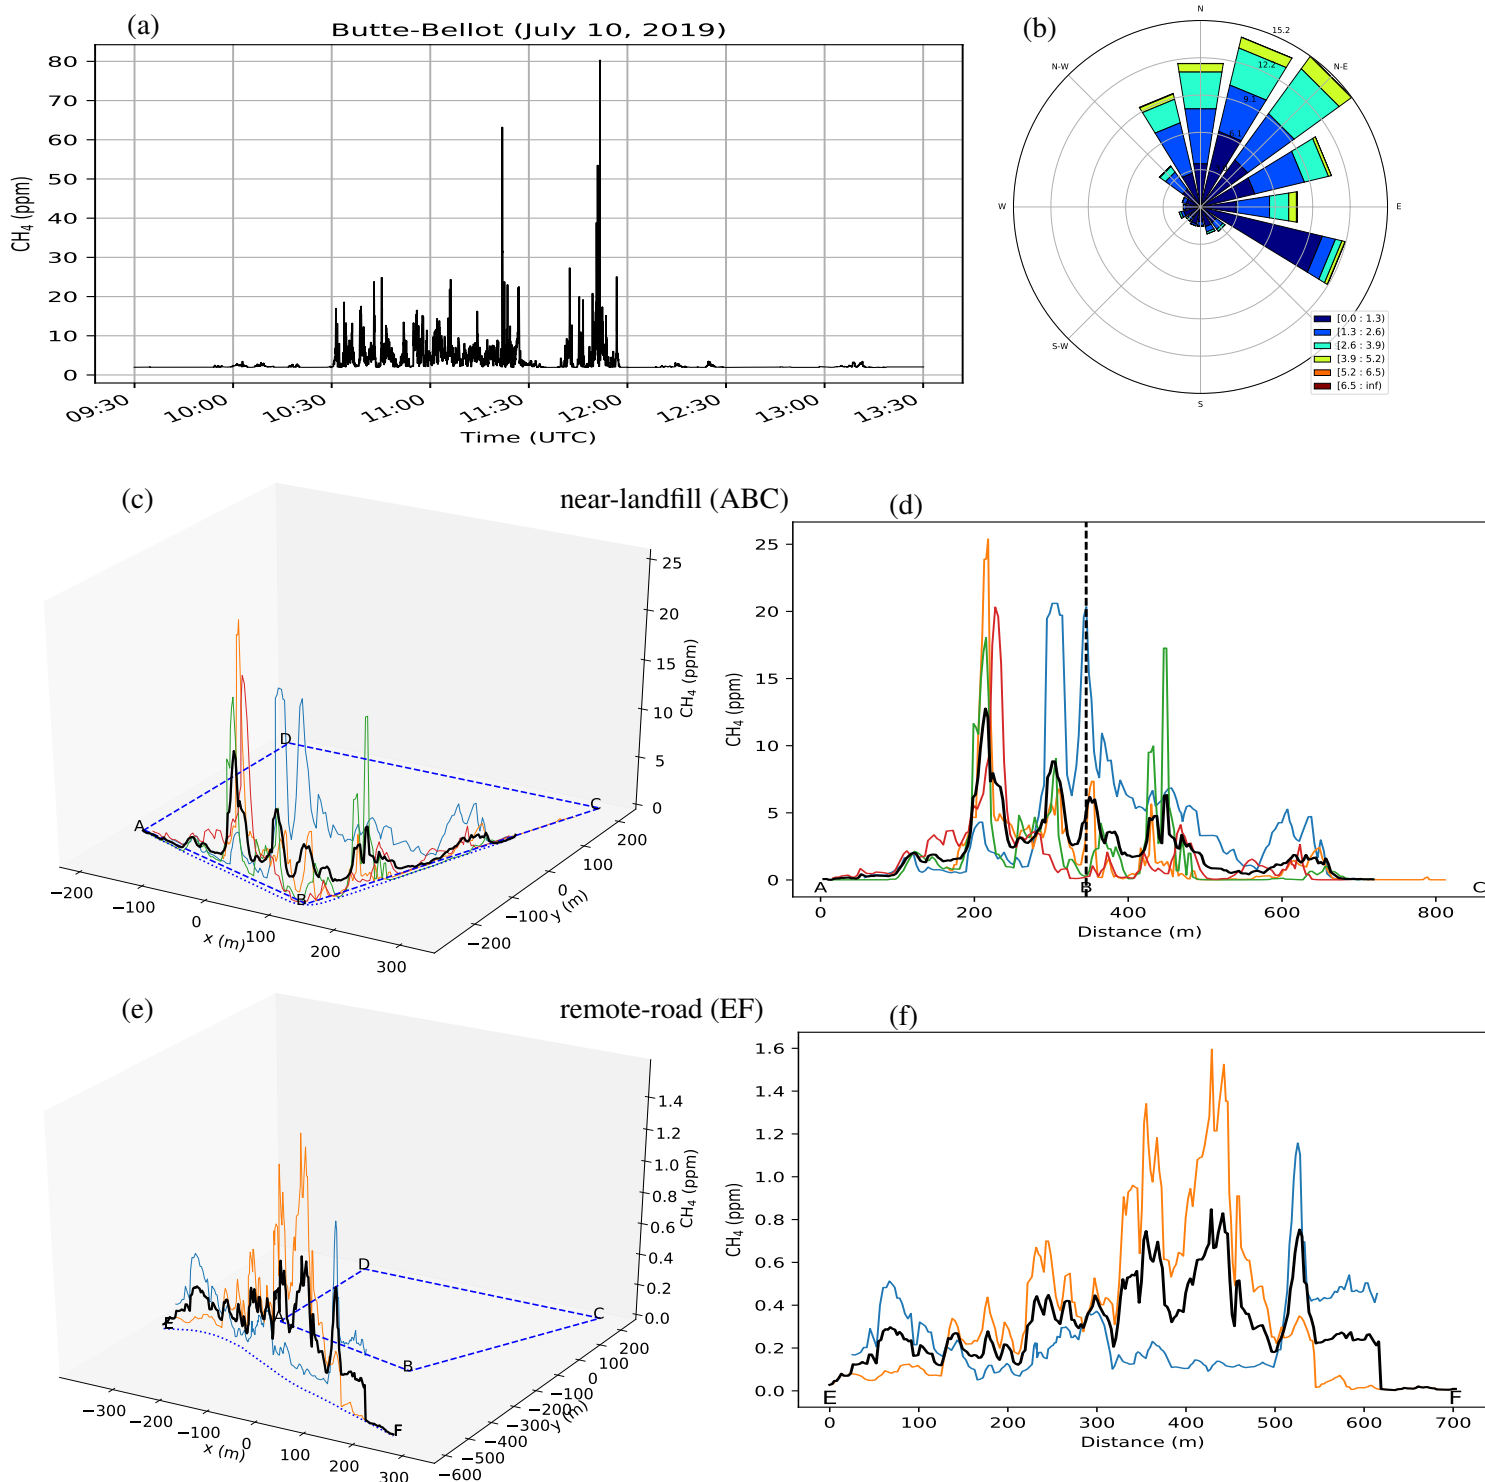

**Figure S1.12.** (a)  $\text{CH}_4$  mole fraction time series from the mobile near-surface measurements and (b) wind rose on **July 10, 2019**. Enhancement of  $\text{CH}_4$  mole fractions above the background in plume transects (c) & (d) along the near-landfill (ABC) road and (e) & (f) far-landfill remote road (EF). The distances along road segments are computed from A and E respectively for near-landfill (ABC) and far-landfill (EF) roads. Black lines in (c)-(f) show the averaged mole fractions computed from these multiple transects.

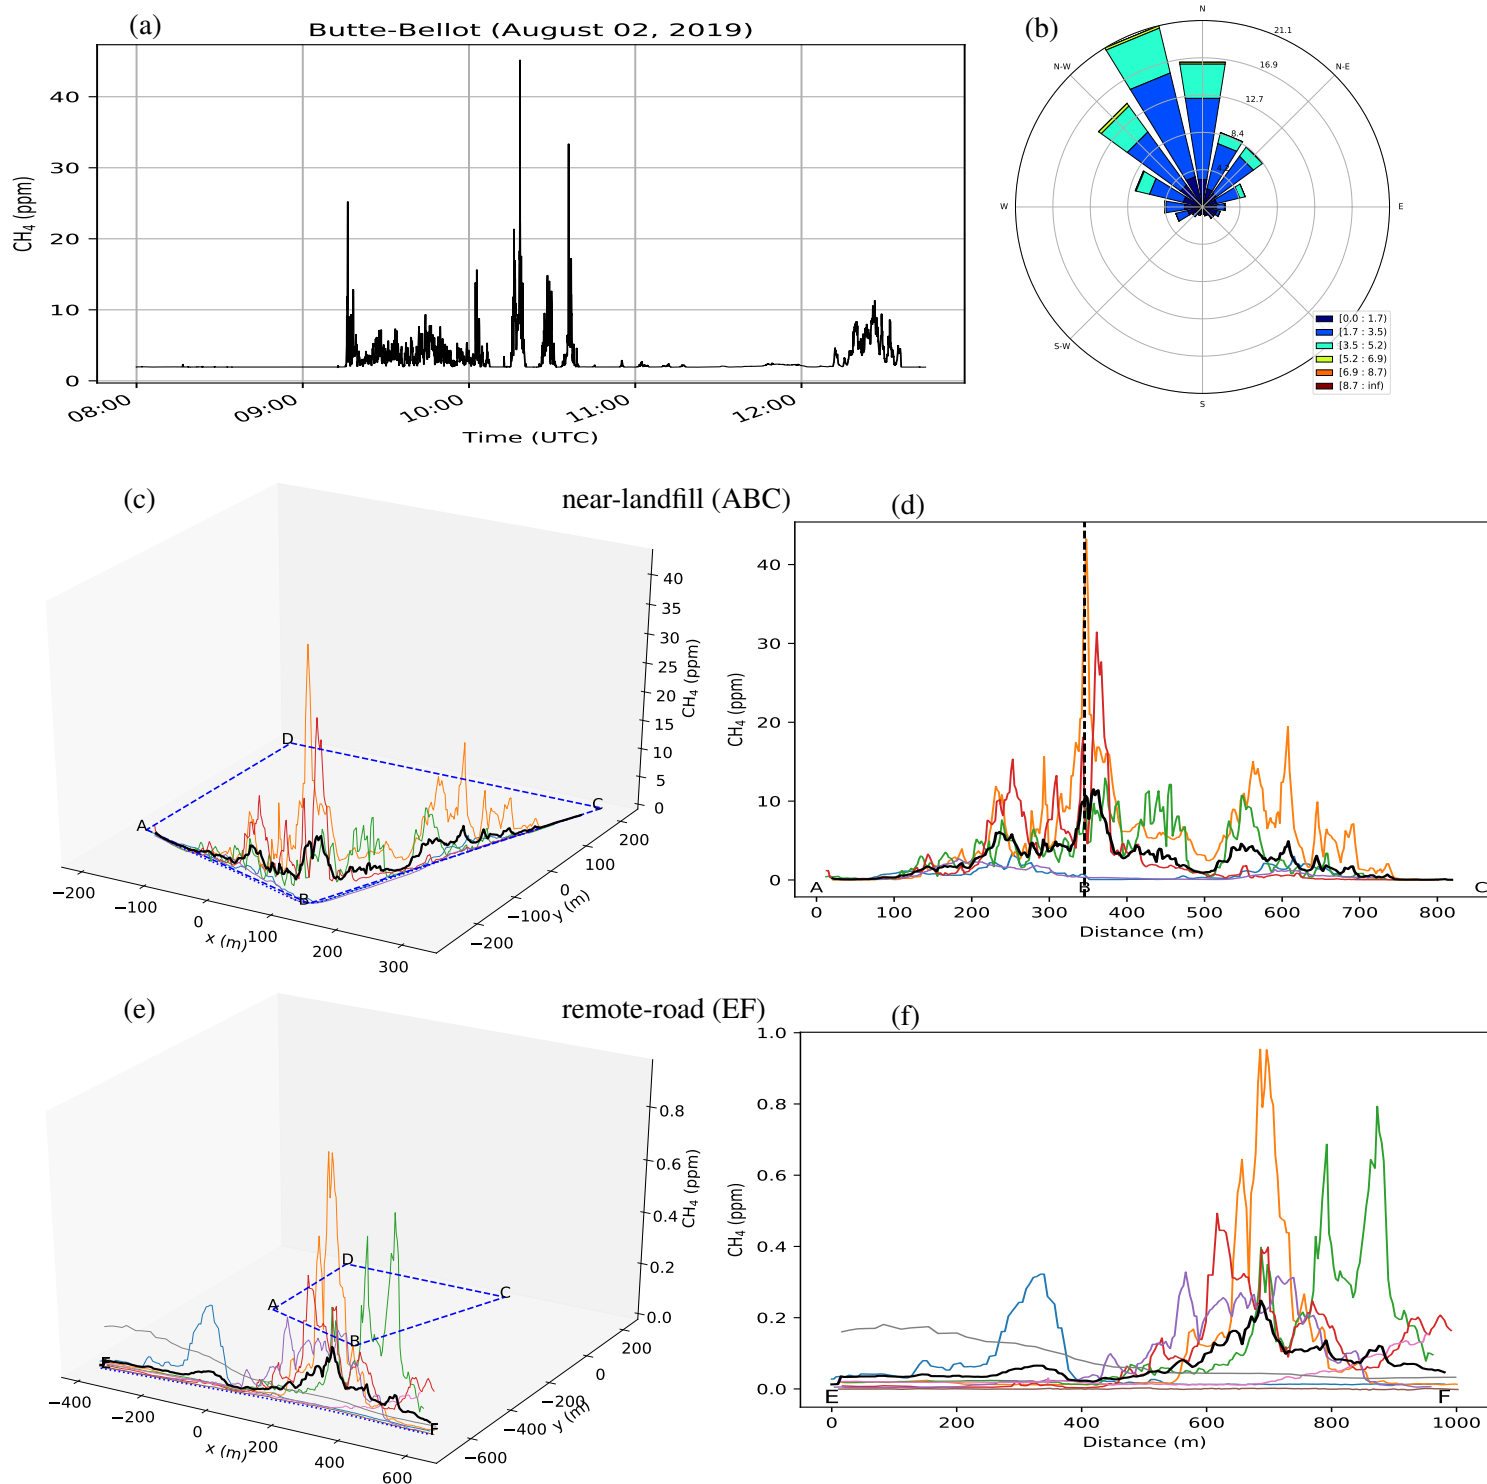

**Figure S1.13.** (a)  $\text{CH}_4$  mole fraction time series from the mobile near-surface measurements and (b) wind rose on **August 02, 2019**. Enhancement of  $\text{CH}_4$  mole fractions above the background in plume transects (c) & (d) along the near-landfill (ABC) road and (e) & (f) far-landfill remote road (EF). The distances along road segments are computed from A and E respectively for near-landfill (ABC) and far-landfill (EF) roads. Black lines in (c)-(f) show the averaged mole fractions computed from these multiple transects.

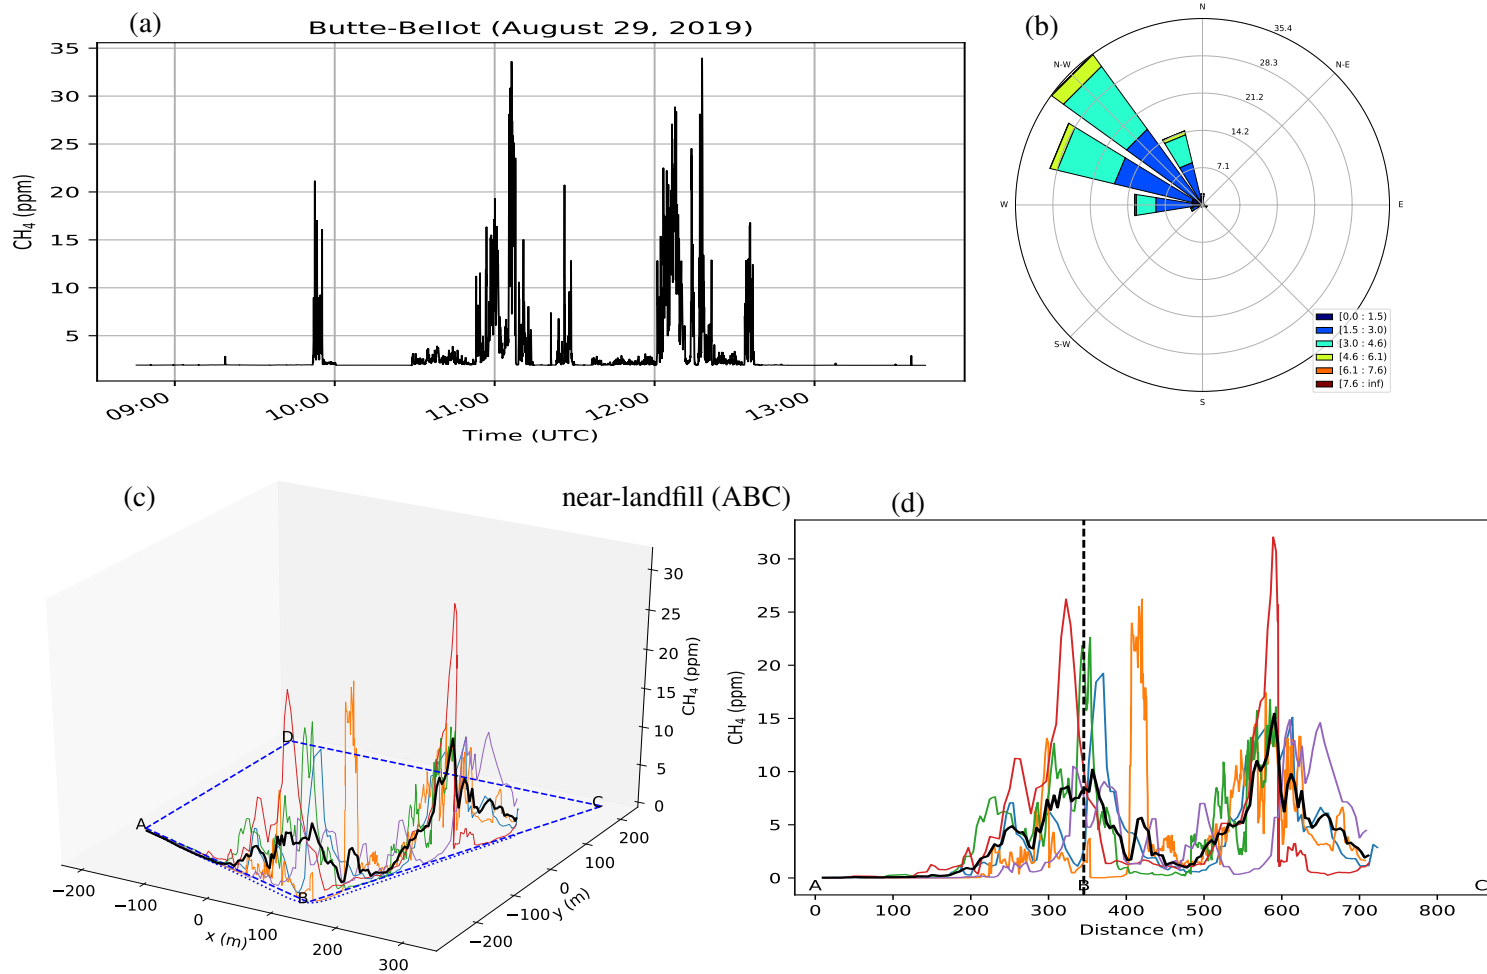

**Figure S1.14.** (a) CH<sub>4</sub> mole fraction time series from the mobile near-surface measurements and (b) wind rose on **August 29, 2019**. Enhancement of CH<sub>4</sub> mole fractions above the background in plume transects (c) & (d) along the near-landfill (ABC) road. The distances along road segments are computed from A. Black lines in (c)-(d) show the averaged mole fractions computed from these multiple transects.

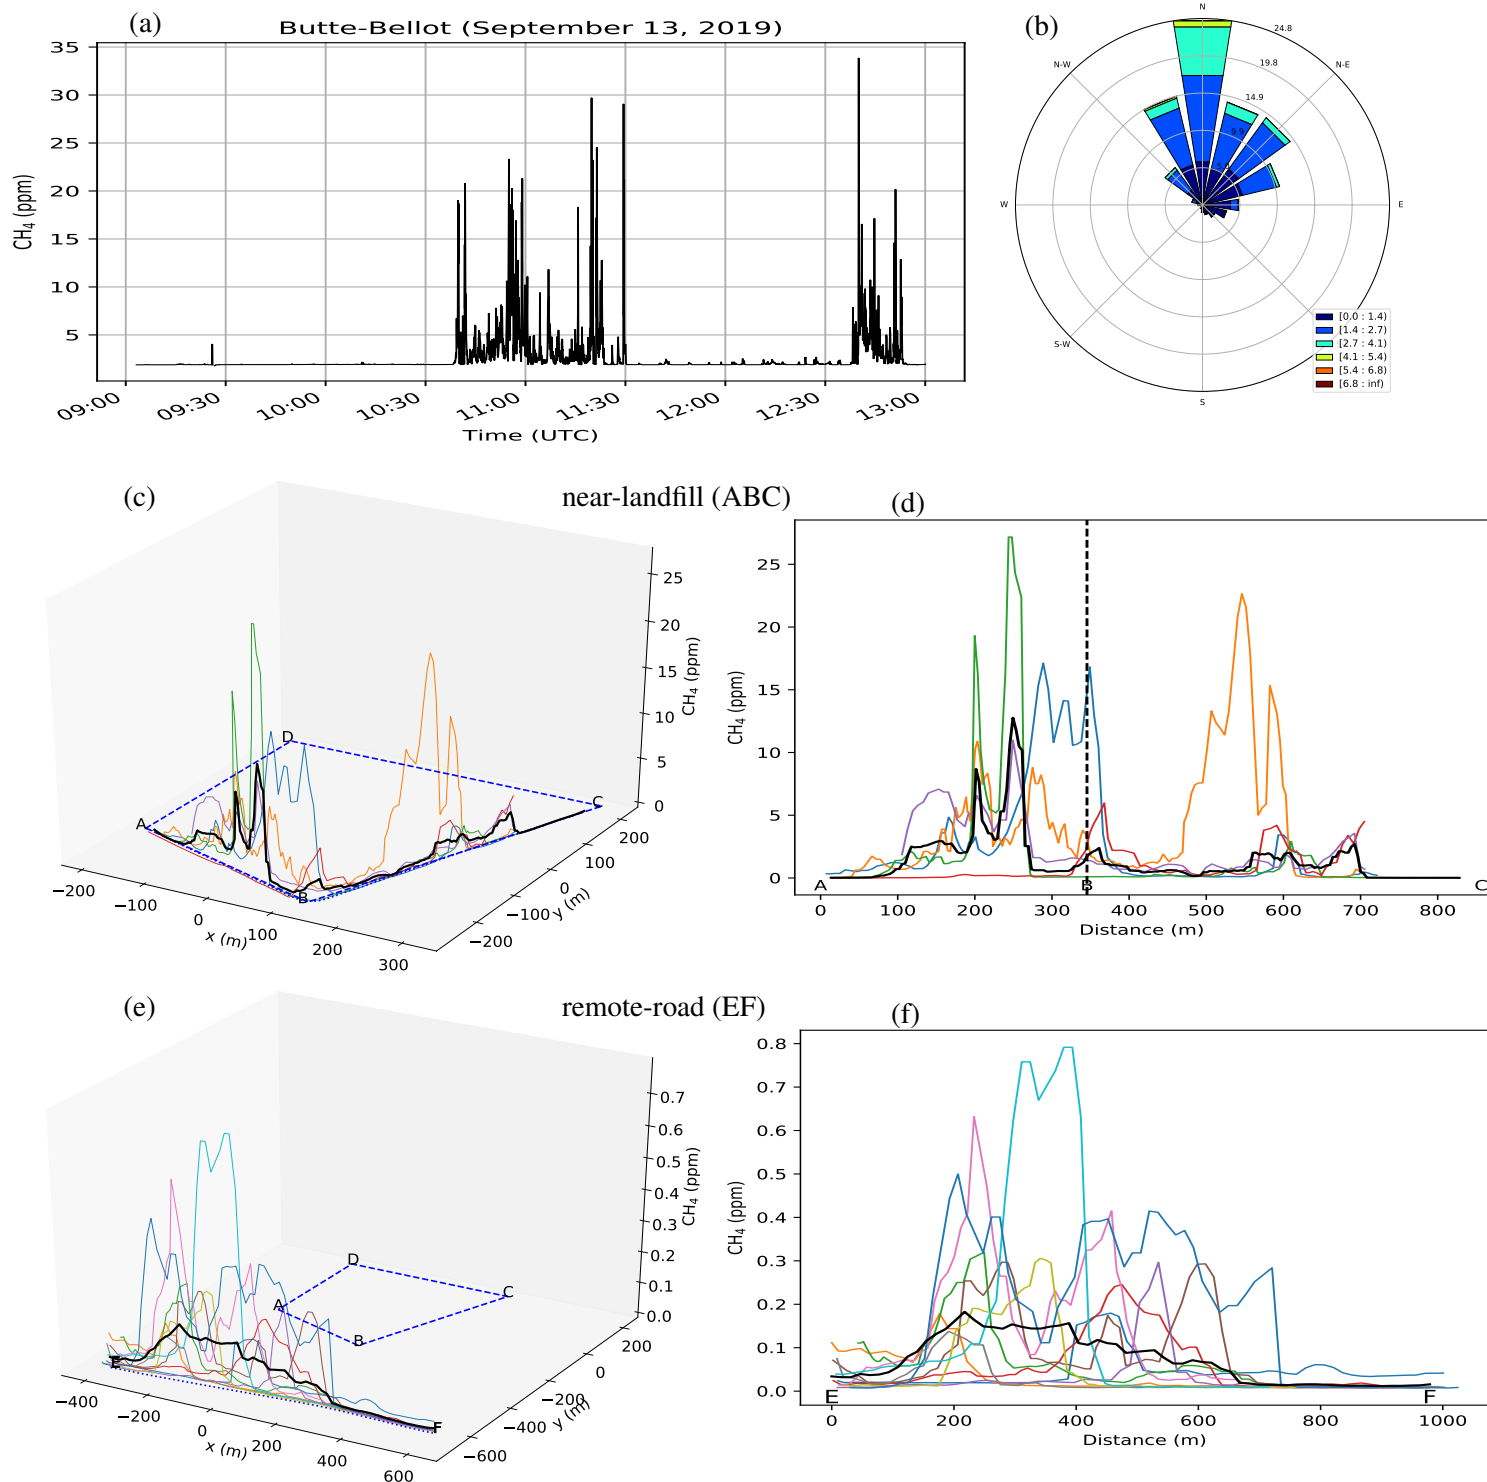

**Figure S1.15.** (a) CH<sub>4</sub> mole fraction time series from the mobile near-surface measurements and (b) wind rose on **September 13, 2019**. Enhancement of CH<sub>4</sub> mole fractions above the background in plume transects (c) & (d) along the near-landfill (ABC) road and (e) & (f) far-landfill remote road (EF). The distances along road segments are computed from A and E respectively for near-landfill (ABC) and far-landfill (EF) roads. Black lines in (c)-(f) show the averaged mole fractions computed from these multiple transects.

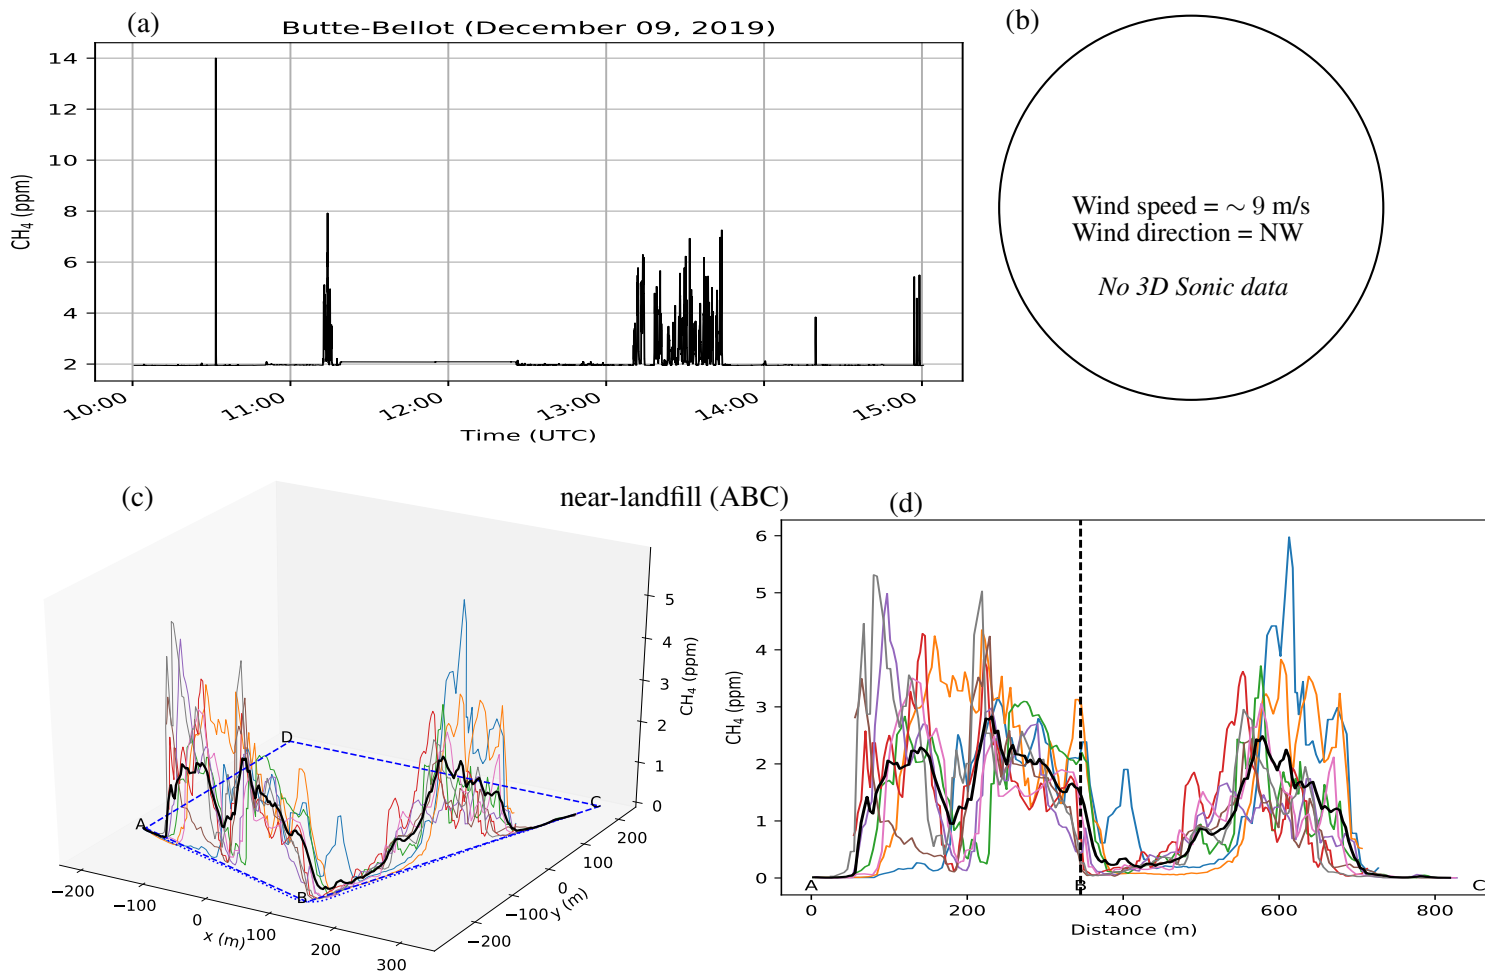

**Figure S1.16.** (a) CH<sub>4</sub> mole fraction time series from the mobile near-surface measurements and (b) wind rose on **December 09, 2019**. Enhancement of CH<sub>4</sub> mole fractions above the background in plume transects (c) & (d) along the near-landfill (ABC) road and (e) & (f) far-landfill remote road (EF). The distances along road segments are computed from A and E respectively for near-landfill (ABC) and far-landfill (EF) roads. Black lines in (c)-(f) show the averaged mole fractions computed from these multiple transects.

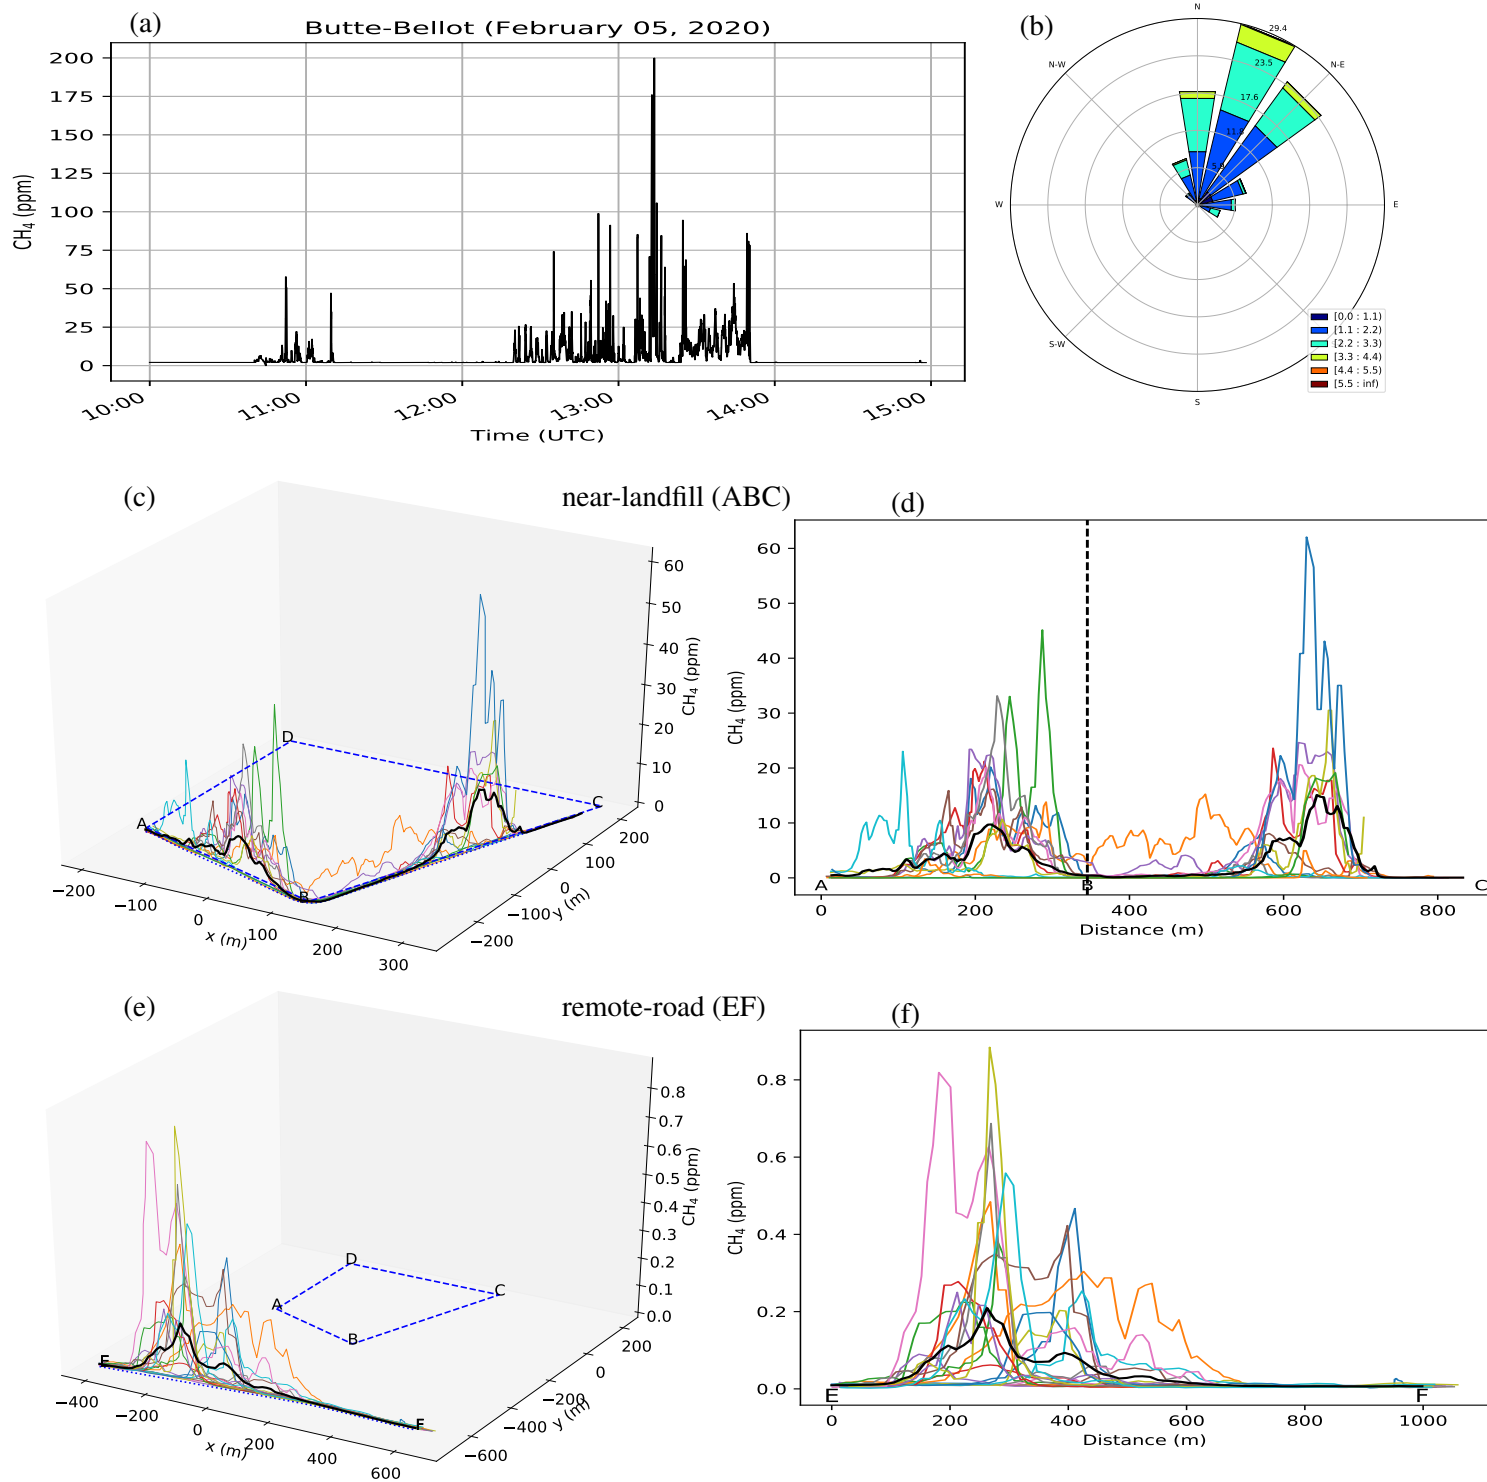

**Figure S1.17.** (a)  $\text{CH}_4$  mole fraction time series from the mobile near-surface measurements and (b) wind rose on **February 05, 2020**. Enhancement of  $\text{CH}_4$  mole fractions above the background in plume transects (c) & (d) along the near-landfill (ABC) road and (e) & (f) far-landfill remote road (EF). The distances along road segments are computed from A and E respectively for near-landfill (ABC) and far-landfill (EF) roads. Black lines in (c)-(f) show the averaged mole fractions computed from these multiple transects.



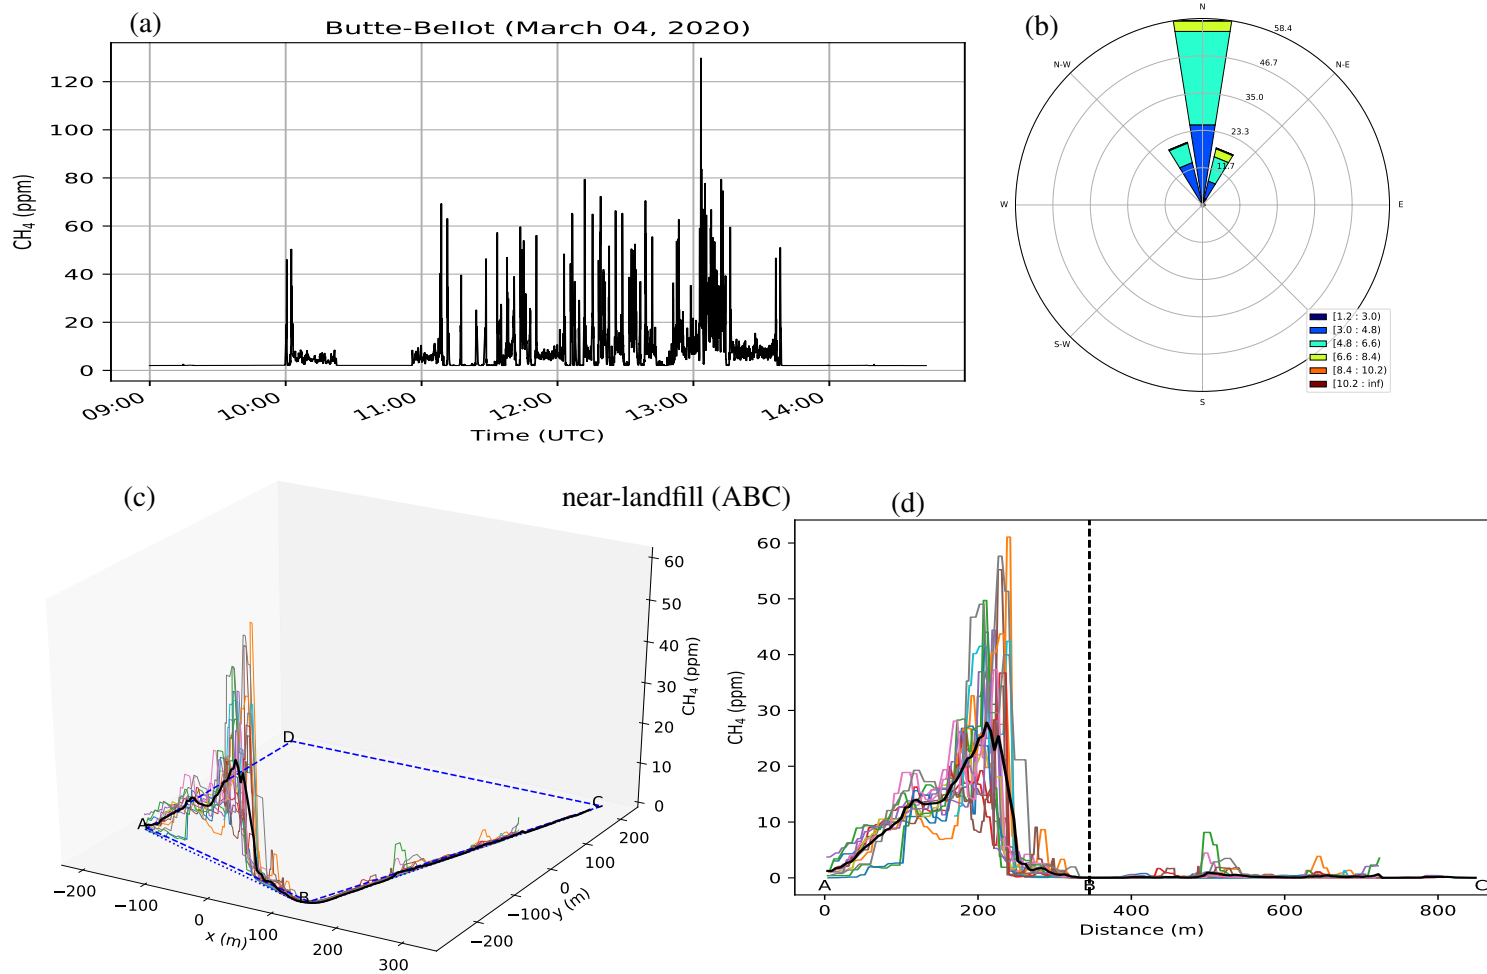

**Figure S1.18.** (a) CH<sub>4</sub> mole fraction time series from the mobile near-surface measurements and (b) wind rose on **March 04, 2020**. Enhancement of CH<sub>4</sub> mole fractions above the background in plume transects (c) & (d) along the near-landfill (ABC) road. The distances along road segments are computed from A for near-landfill (ABC) road. Black lines in (c)-(d) show the averaged mole fractions computed from these multiple transects.

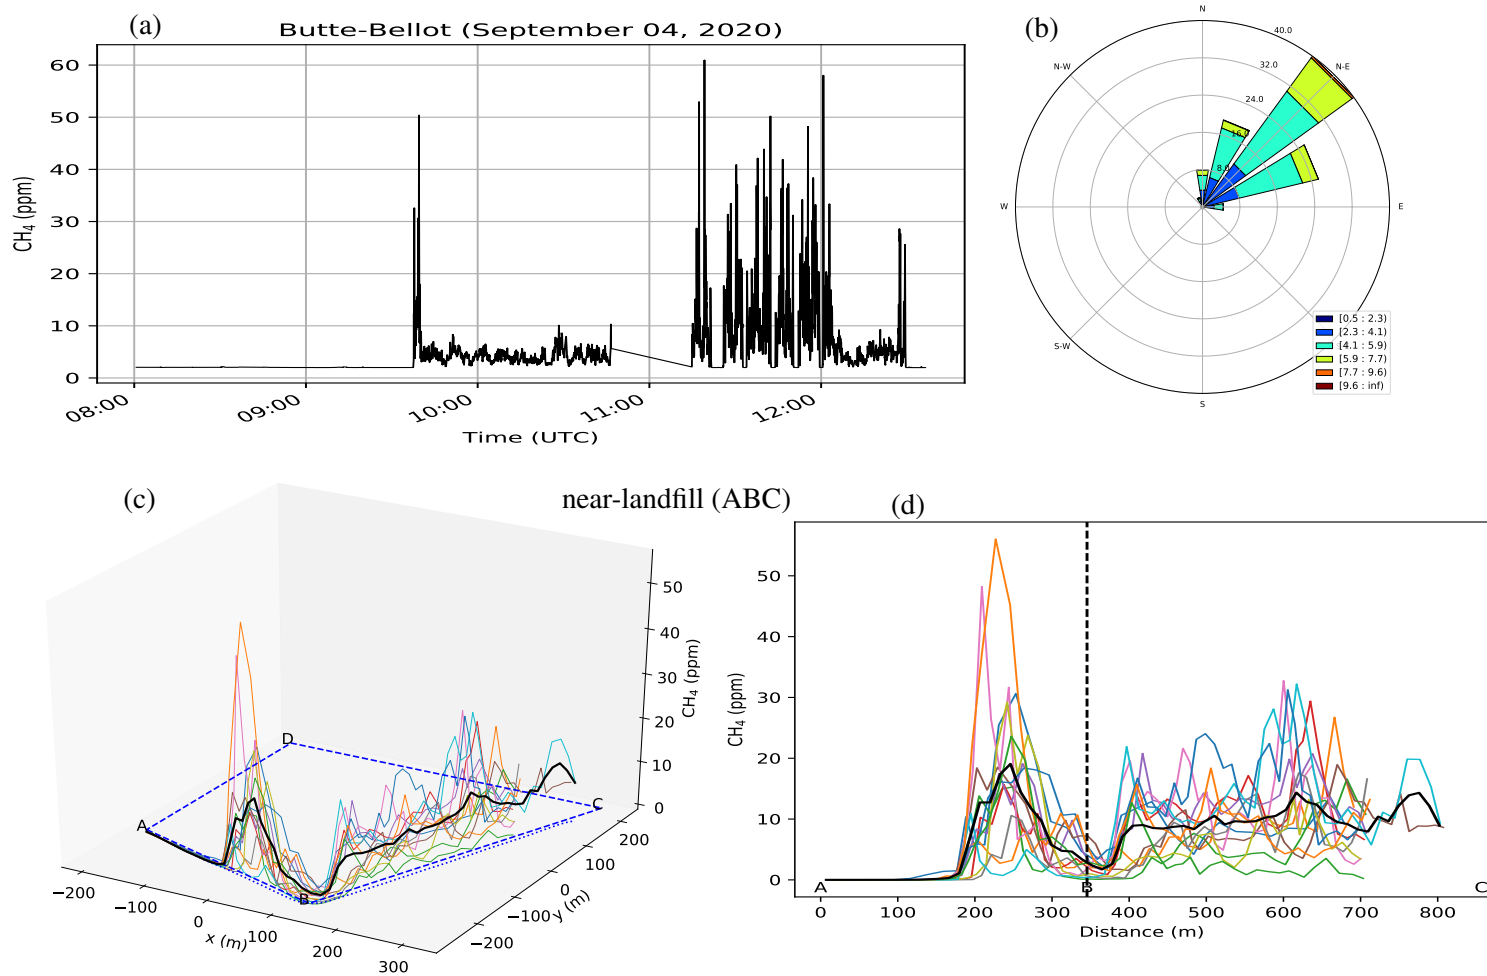

**Figure S1.19.** (a) CH<sub>4</sub> mole fraction time series from the mobile near-surface measurements and (b) wind rose on **September 04, 2020**. Enhancement of CH<sub>4</sub> mole fractions above the background in plume transects (c) & (d) along the near-landfill (ABC) road. The distances along road segments are computed from A for near-landfill (ABC) road. Black lines in (c)-(d) show the averaged mole fractions computed from these multiple transects.

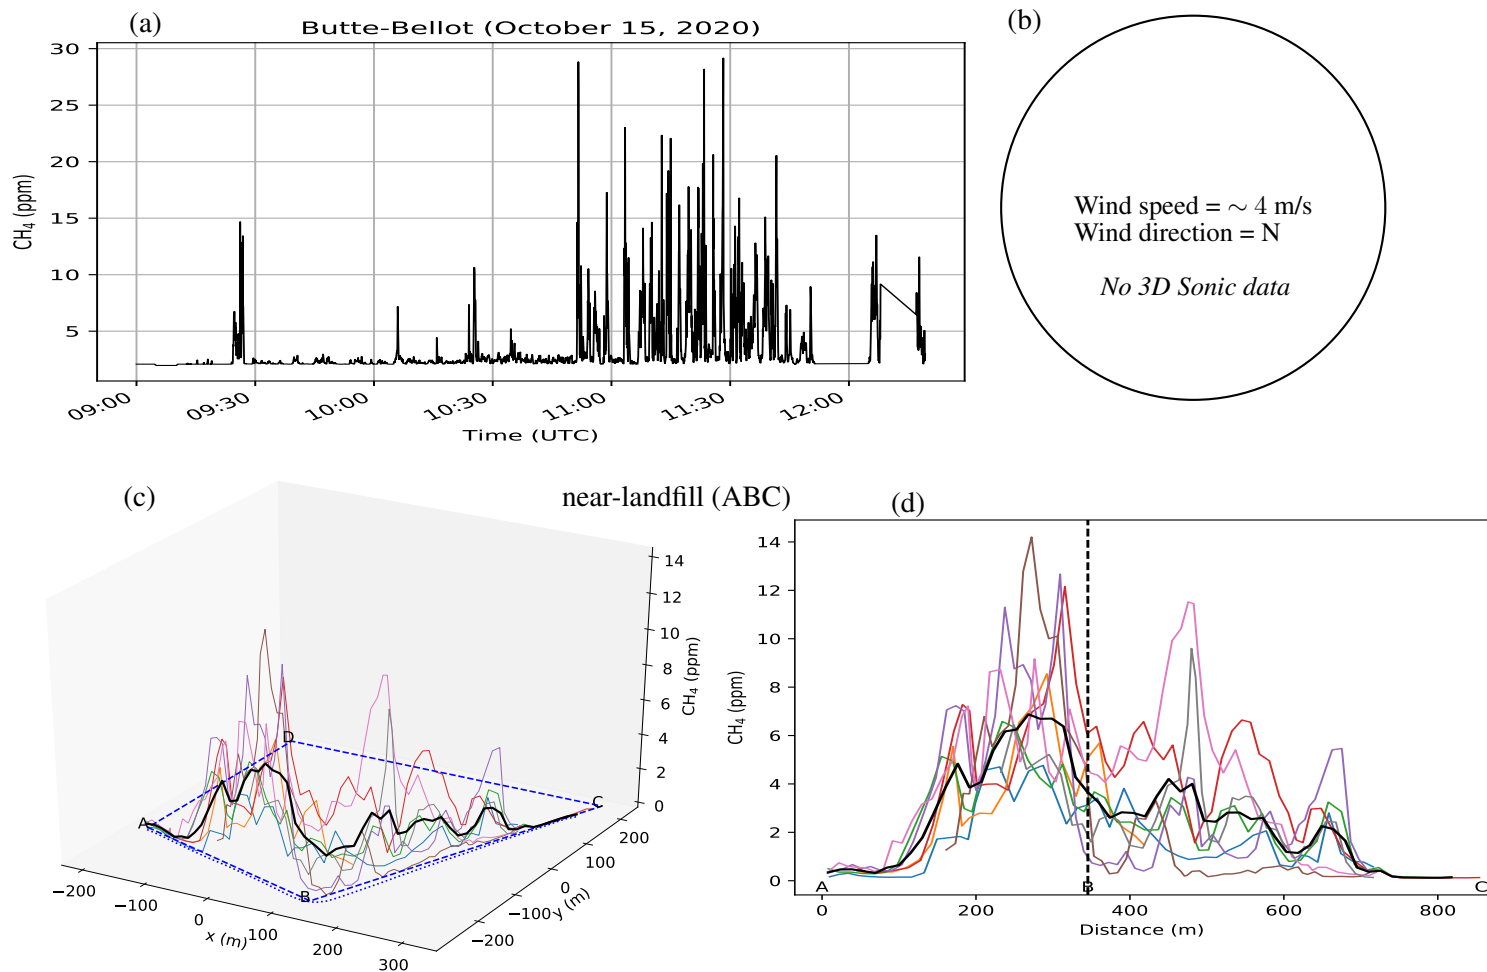

**Figure S1.20.** (a)  $\text{CH}_4$  mole fraction time series from the mobile near-surface measurements and (b) wind conditions on **October 15, 2020**. Enhancement of  $\text{CH}_4$  mole fractions above the background in plume transects (c) & (d) along the near-landfill (ABC) road. The distances along road segments are computed from A for near-landfill (ABC) road. Black lines in (c)-(d) show the averaged mole fractions computed from these multiple transects.

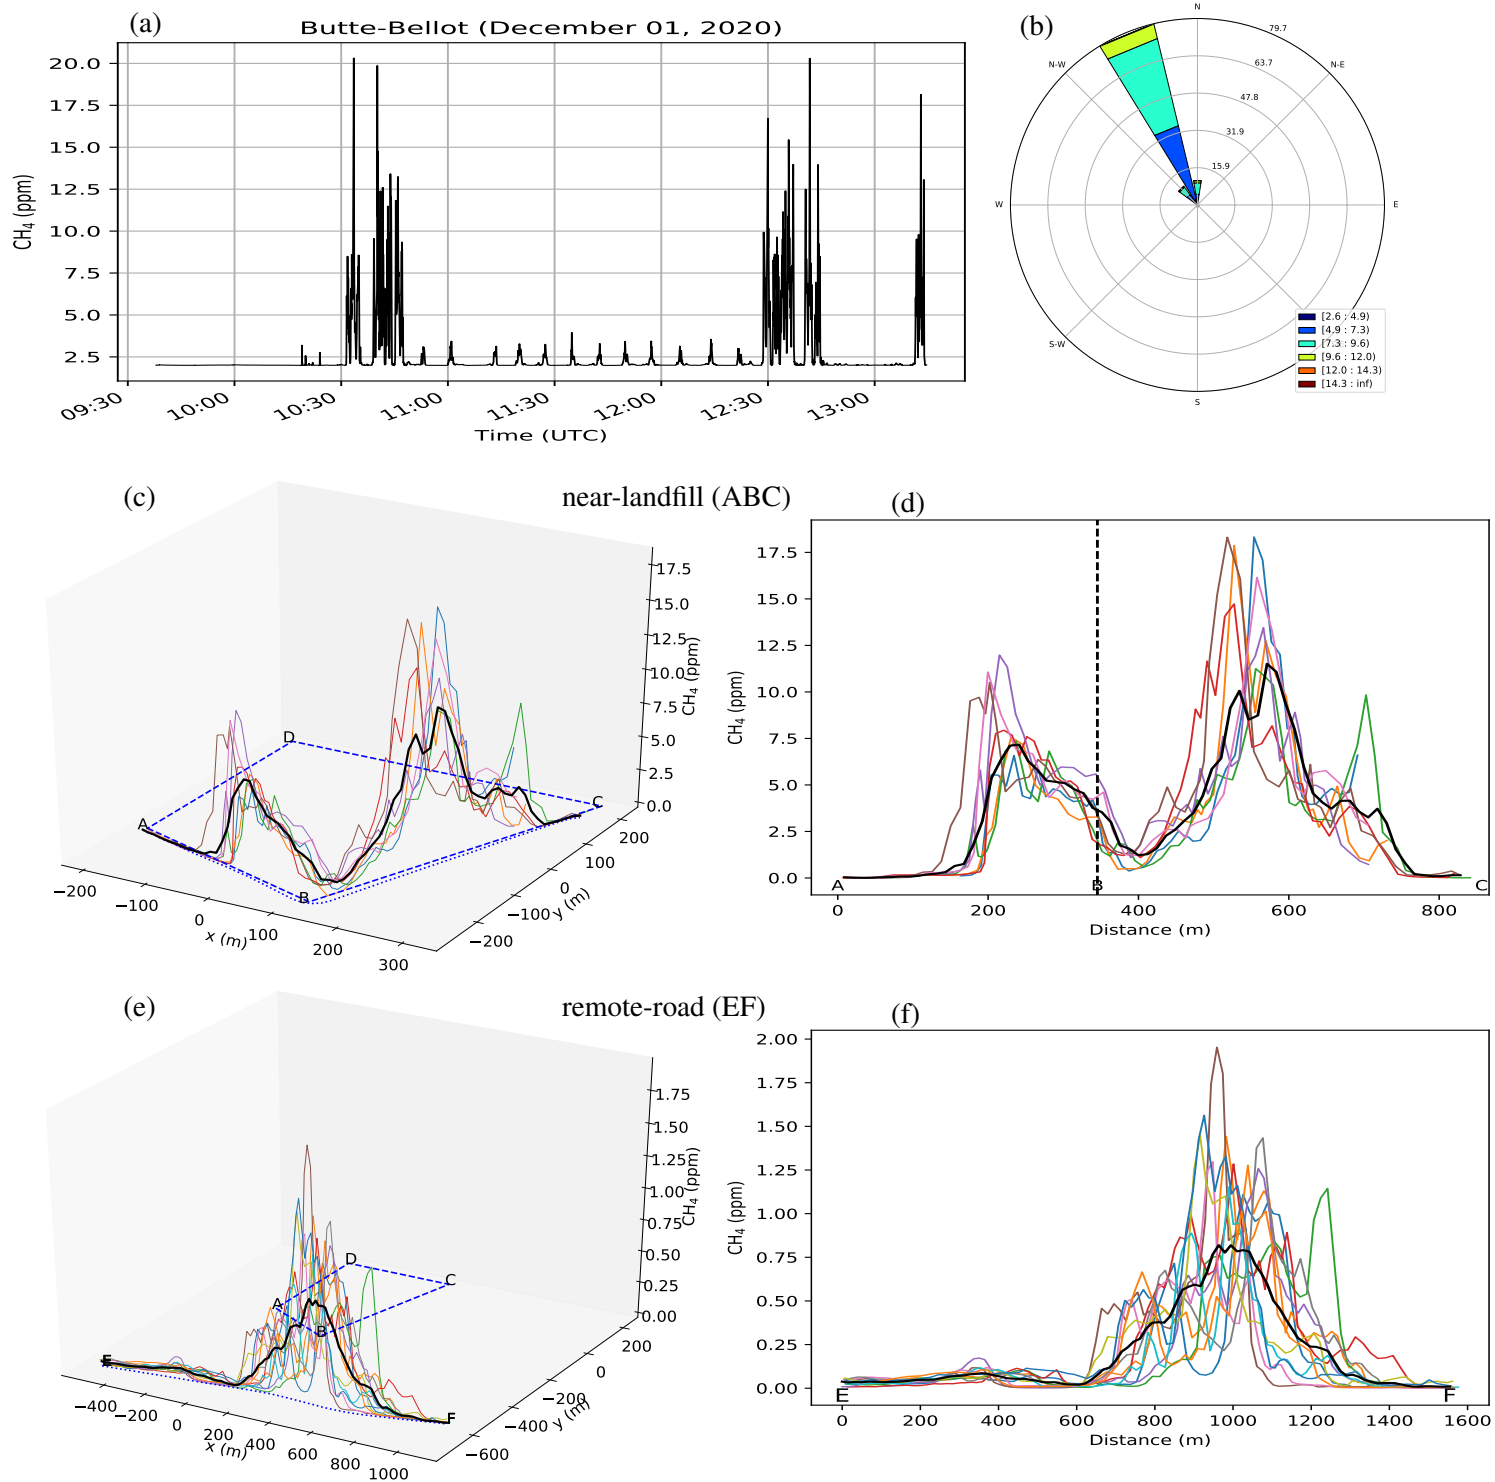

**Figure S1.21.** (a) CH<sub>4</sub> mole fraction time series from the mobile near-surface measurements and (b) wind rose on **December 01, 2020**. Enhancement of CH<sub>4</sub> mole fractions above the background in plume transects (c) & (d) along the near-landfill (ABC) road and (e) & (f) far-landfill remote road (EF). The distances along road segments are computed from A and E respectively for near-landfill (ABC) and far-landfill (EF) roads. Black lines in (c)-(f) show the averaged mole fractions computed from these multiple transects.

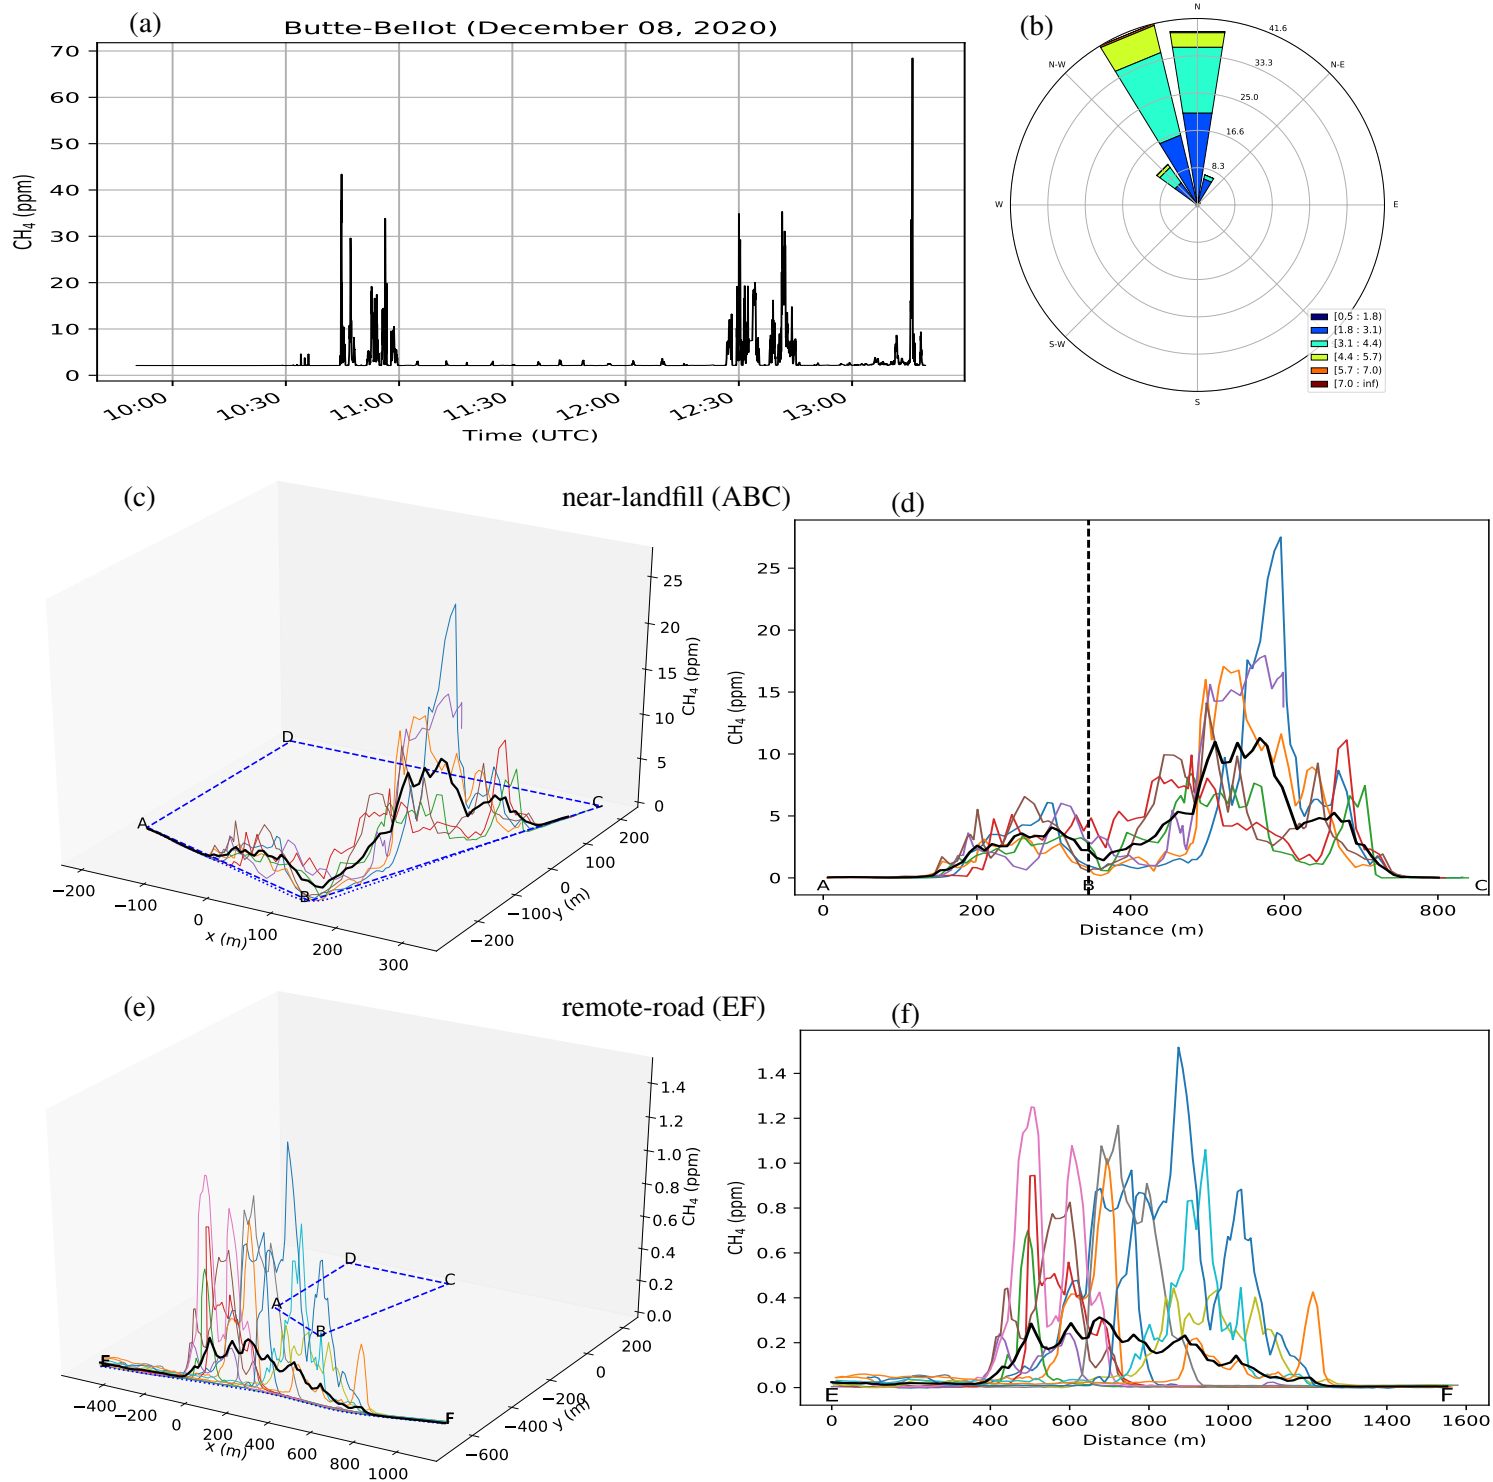

**Figure S1.22.** (a)  $\text{CH}_4$  mole fraction time series from the mobile near-surface measurements and (b) wind rose on **December 08, 2020**. Enhancement of  $\text{CH}_4$  mole fractions above the background in plume transects (c) & (d) along the near-landfill (ABC) road and (e) & (f) far-landfill remote road (EF). The distances along road segments are computed from A and E respectively for near-landfill (ABC) and far-landfill (EF) roads. Black lines in (c)-(f) show the averaged mole fractions computed from these multiple transects.
